# 1                    **Loss of O-GlcNAcylation on MeCP2 Thr 203 Leads to** 2                    **Neurodevelopmental Disorders**

3  
4 Juanxian Cheng<sup>1#</sup>, Zhe Zhao<sup>1#</sup>, Liping Chen<sup>1</sup>, Ruijing Du<sup>1</sup>, Yan Wu<sup>1</sup>, Qian Zhu<sup>1</sup>, Ming Fan<sup>1,3</sup>,  
5 Xiaotao Duan<sup>4\*</sup>, Haitao Wu<sup>1,2,3,5\*</sup>

6 <sup>1</sup>Department of Neurobiology, Beijing Institute of Basic Medical Sciences, 100850 Beijing, China;

7 <sup>2</sup>Chinese Institute for Brain Research, 102206 Beijing, China.

8 <sup>3</sup>Key Laboratory of Neuroregeneration, Co-innovation Center of Neuroregeneration, Nantong  
9 University, Nantong, 226019 Jiangsu Province, China

10 <sup>4</sup>State Key Laboratory of Toxicology and Medical Countermeasures, Beijing Institute of  
11 Pharmacology and Toxicology, 100850 Beijing, China

12 <sup>5</sup>Lead Contact

13 # These authors contributed equally to this work

14  
15  
16 \*Correspondence:

17 Haitao Wu, Department of Neurobiology, Beijing Institute of Basic Medical Sciences, Taiping  
18 Rd.27, Haidian District, Beijing, 100850, China

19 Tel: +86-10-66931363; Fax: +86-10-68213039; E-mail: [wuht@bmi.ac.cn](mailto:wuht@bmi.ac.cn)

20  
21 Xiaotao Duan, State Key Laboratory of Toxicology and Medical Countermeasures, Beijing  
22 Institute of Pharmacology and Toxicology, Taiping Rd.27, Haidian District, Beijing, 100850,  
23 China

24 Tel: +86-10-66874710; E-mail: [xduan@ncba.ac.cn](mailto:xduan@ncba.ac.cn)

25  
26 **Running title:** MeCP2 T203 O-GlcNAc Regulates Neural Development

27

28 **Abstract**

29 Mutations of the X-linked methyl-CpG-binding protein 2 (*MECP2*) gene in humans are  
30 responsible for most cases of Rett syndrome (RTT), an X-linked progressive neurological disorder.  
31 While genome-wide screens in clinical trials reveal several putative RTT-associated mutations on  
32 *MECP2*, their causative relevance regarding the functional regulation of MeCP2 on the etiologic  
33 sites at the protein level require more evidence. In this study, we demonstrate that MeCP2 is  
34 dynamically modified by O-linked- $\beta$ -N-acetylglucosamine (O-GlcNAc) at threonine 203 (T203), an  
35 etiologic site in RTT patients. Disruption of the O-GlcNAcylation of MeCP2 specifically at T203  
36 impairs dendrite development and spine maturation in cultured hippocampal neurons, and  
37 disrupts neuronal migration, dendritic spine morphogenesis and dysfunction of synaptic  
38 transmission in the developing and juvenile mouse cerebral cortex. Mechanistically, genetic  
39 disruption of O-GlcNAcylation at T203 on MeCP2 decreases neuronal activity-induced induction  
40 of *Bdnf* transcription. Our study highlights the critical role of MeCP2 T203 O-GlcNAcylation in  
41 neural development and synaptic transmission potentially *via* BDNF.

42

43 **Keywords:** MeCP2; O-GlcNAcylation; dendrite development; synaptic transmission; BDNF

44

## 45 INTRODUCTION

46 Rett syndrome (RTT) is a severe X-linked neurodevelopmental disorder that preferentially  
47 occurred in females, with an approximate incidence of 1:10,000<sup>1, 2</sup>. Almost 90% of RTT cases  
48 are caused by methyl-CpG-binding protein 2 (*MECP2*) gene mutations such as missense,  
49 nonsense, insertion, deletion, and splice-site variations<sup>3, 4, 5</sup>, and loss of MeCP2 is closely related  
50 to the occurrence of RTT<sup>1, 6, 7, 8</sup>. MeCP2 activity in normal central nervous system (CNS)  
51 development and function is controlled by both precise expression levels<sup>9, 10</sup> and post-  
52 translational modifications (PTMs). For example, neurons from *Mecp2*-null mutant mice have  
53 smaller somas<sup>11, 12</sup>, decreased dendritic complexity<sup>13, 14, 15</sup> and dysfunction of synaptic plasticity  
54<sup>16, 17, 18</sup>. Gain-of-function MeCP2 by overexpression in transgenic mice or monkeys results in  
55 progressive neurological and psychiatric dysfunctions<sup>19, 20</sup>. These genetic studies suggest that  
56 precise and dynamic expression of MeCP2 is critical to maintain normal brain development and  
57 function.

58 In addition to expression level, PTMs on MeCP2 such as phosphorylation have been  
59 demonstrated as critical regulators of its role in dendritic growth, spine maturation, and activation  
60 of calcium-dependent brain-derived neurotrophic factor (BDNF) gene expression, suggesting  
61 that MeCP2 PTMs particularly impact neurodevelopment processes and activity-dependent  
62 gene expression.<sup>21, 22, 23, 24, 25</sup> Recently, the novel PTM O-GlcNAcylation has emerged as a  
63 potent regulator of neurogenesis and synaptic plasticity<sup>26, 27, 28</sup>. O-GlcNAcylation is a highly  
64 dynamic process<sup>29, 30, 31</sup>. O-GlcNAc transferase (OGT) catalyzes the addition of O-GlcNAc to  
65 serine and threonine residues on intracellular proteins, whereas O-GlcNAcase (OGA) results in  
66 the removal of O-GlcNAc modifications<sup>29, 31, 32</sup>. Previous studies have identified O-GlcNAcylation  
67 as a potent modulator of neuronal differentiation<sup>26, 33</sup> and synaptic plasticity<sup>34</sup>. Interestingly,  
68 MeCP2 was found to be O-GlcNAcylated and phosphorylated simultaneously in rat cortical  
69 neurons<sup>35, 36</sup>. However, despite the critical role of both O-GlcNAcylation and MeCP2 on neural  
70 development and synaptic transmission, the physiological function and molecular mechanisms

71 of human MeCP2 O-GlcNAcylation remain elusive.

72 In this report, we first used mass spectrometry (MS) to systematically identify O-  
73 GlcNAcylation sites on mice, rats, and human MeCP2. We found that human MeCP2 T203, a  
74 site previously implicated in the pathogenesis of RTT<sup>37, 38, 39</sup>, was O-GlcNAcylated at relatively  
75 high levels at baseline compared to rodent species. Furthermore, we demonstrated the critical  
76 role of MeCP2 T203 O-GlcNAcylation in the regulation of dendrite outgrowth, dendritic spine  
77 morphogenesis and synaptic transmission both *in vitro* and *in vivo*. Mechanistic studies suggest  
78 that this may be due to the regulation of neuronal activity-induced induction of *Bdnf* transcription.  
79 Together, our results identified a previously unknown function of O-GlcNAcylated MeCP2 T203,  
80 which may be essential for understanding the molecular mechanisms behind the neuropathology  
81 of *MECP2* mutation-caused RTT.

82

## 83 RESULTS

### 84 ***Identification of O-GlcNAcylation Sites on MeCP2***

85 To understand whether MeCP2 is a highly conserved protein in different species, we first  
86 investigated the evolutionary divergence of the *Mecp2* gene from humans and 25 additional  
87 representative species using phylogeny tree reconstruction. We found that the protein  
88 sequences of MeCP2 are conserved among most mammals, with distance values less than 0.1,  
89 suggesting the sequence similarity between each pair of mammalian MeCP2 protein is over 90%.  
90 In contrast, sequence distances were much higher between mammalian and non-mammalian  
91 species. This indicates that the protein sequence and function of MeCP2 have undergone  
92 substantial changes during the evolution of vertebrates, but are relatively conserved in mammals  
93 (Fig. 1A).

94 O-GlcNAcylation is highly dynamic and reversible in cellular systems. In order to better  
95 capture and concentrate O-GlcNAcylated MeCP2 for MS, HA-tagged MeCP2 in different species  
96 were co-expressed with OGT in HEK293T cells, and co-immunoprecipitated (co-IP) with anti-HA

97 antibody-conjugated beads followed by in-gel trypsin digestion (Fig. S1A). The digested MeCP2  
98 peptides were subjected to high-resolution mass spectrometry (MS, nanoLC-LTQ-CID/ETD-  
99 Orbitrap) analysis (Table S1) (Fig. S1B-F). In addition to the O-GlcNAcylated sites on T434 and  
100 T444, which have been previously identified in rat MeCP2<sup>35, 36</sup>, we mapped 11 novel O-  
101 GlcNAcylation sites from mouse (mMeCP2), rat (rMeCP2) and human (hMeCP2) (Fig. 1B). To  
102 examine the potential relevance of these novel MeCP2 O-GlcNAc sites for neurodevelopmental  
103 disorders including RTT, we next compared them with the RTT disease-related *MECP2* mutation  
104 sites reported from RettBASE<sup>37, 38, 39</sup>, a database that catalogues clinically-relevant *MECP2*  
105 mutations. Interestingly, we found that three O-GlcNAcylated sites (S68, T203 and S204) were  
106 mutated in some RTT clinical cases<sup>40</sup> (Table S2). In addition, human MeCP2 T436 (homologue  
107 of T434 in mMeCP2 and rMeCP2) O-GlcNAcylation may also be implicated, although no  
108 identified clinical cases have been associated with the mutation. Therefore, we mainly focused  
109 on four O-GlcNAcylated sites of human MeCP2 including S68, T203, S204 and T436 in the  
110 following assays (Fig. 1C-F). Of these sites, additional analysis pointed to T203 as a particularly  
111 interesting target. We compared the MeCP2 O-GlcNAcylation sites identified in this study from  
112 eight different species to assess their conservation (Fig. 1G). While the majority of these sites  
113 are conserved among vertebrate animals, T203 O-GlcNAcylation was selectively conserved in  
114 primates such as human, macaque, chimpanzee, and marmoset, but not in rodents. Given that  
115 MeCP2 T203 is an etiologic site in RTT patients, the T203 site may carry particular evolutionary  
116 functional significance in the brains of high primates.

117

### 118 ***MeCP2 is O-GlcNAcylated at T203 by Direct Interaction with OGT***

119 The above MS results indicate that MeCP2 may serve as a new protein substrate of OGT  
120 (Fig. S1G). To test this hypothesis, we first investigated the interaction between MeCP2 and OGT,  
121 and to identify the MeCP2-binding domain within OGT. Endogenous MeCP2 from mouse whole  
122 brain lysates were co-immunoprecipitated with native OGT (Fig. 2A). Reciprocal assays in mouse

123 brain lysates showed that OGT also co-immunoprecipitated with MeCP2 (Fig. 2B), strongly  
124 suggesting physiological interaction *in vivo*. To further explore if MeCP2 and OGT bind via direct  
125 protein-protein interaction, we performed an *in vitro* GST protein pull-down assay using purified  
126 GST-fused OGT and human MeCP2 protein. GST-fused OGT, but not GST alone, was able to  
127 pull down MeCP2 and *vice versa*, suggesting direct binding with each other (Fig. 2C and D). To  
128 reveal the reciprocal binding domains supporting the interaction of OGT with MeCP2, we first  
129 generated various human OGT deletion mutants. Co-IP assays showed that deletion of the entire  
130 N-terminal TPR domain (aa 2-465) of OGT completely disrupted the interaction between OGT  
131 and MeCP2, suggesting the TPR domain is necessary (Fig. 2E and F). Next, domain mapping  
132 analysis showed that deletion of 4-6 TPR (aa 114-214), 7-9 TPR (aa 215-316) or 10-13.5 TPR  
133 (aa 317-465), had no effects on the interaction between OGT and MeCP2 (Fig. 2E and F). In  
134 contrast, deletion of the 1-3 TPR domain (aa 2-113) of OGT significantly abolished the binding  
135 (Fig. 2E-H), suggesting OGT directly interacts with MeCP2 *via* its N-terminal 1-3 TPR domain.  
136 Moreover, in order to identify critical OGT-binding domains on MeCP2, we used MeCP2 deletion  
137 mutants in co-IP binding experiments with OGT, and found that both NTD and CTD domains of  
138 MeCP2 are necessary (Fig. S2).

139 To further study the mechanisms of MeCP2 O-GlcNAcylation by OGT *in vivo*, we setup a  
140 well-established chemoenzymatic labelling approach <sup>41</sup> to detect MeCP2 O-GlcNAcylation from  
141 whole brain lysates (Fig. 3A). O-GlcNAc-modified proteins from mouse brain lysates were  
142 enzymatically labelled with an azido-N-acetylgalactosamine sugar and biotinylated via Cu(I)-  
143 mediated [3+2] azide-alkyne cycloaddition (CuACC) chemistry, which were captured with  
144 streptavidin agarose beads, and subsequently immunoblotted with an antibody against MeCP2  
145 (Fig. 3A). As shown in Fig. 3B, O-GlcNAcylation occurs in endogenous MeCP2 in wild type (WT)  
146 mice *in vivo*, and much stronger O-GlcNAcylation modification of MeCP2 was detected in  
147 overexpression of *MECP2* transgenic mice <sup>19</sup> compared with WT mice. The above results suggest  
148 direct protein-protein binding between MeCP2 and OGT that results in O-GlcNAcylation of MeCP2

149 (Fig. 2). To further confirm that OGT catalyzes MeCP2 upon direct protein binding, we used co-IP  
150 assay to demonstrate that ectopic GFP-tagged hMeCP2 was O-GlcNAcylated in the presence of  
151 OGT in transfected HEK293T cells (Fig. 3C). Additionally, *in vitro* O-GlcNAcylation assay further  
152 confirmed that His-tagged hMeCP2 was directly O-GlcNAcylated by GST-tagged enzyme domain  
153 of OGT (323-1041)<sup>42</sup> (Fig. 3D).

154 Because our MS results indicated several O-GlcNAcylation sites in hMeCP2 with potential  
155 relevance to RTT (Fig. 1 and Fig. S1) we wanted to further identify major functional O-  
156 GlcNAcylation activity among these sites. To test this, MeCP2 S68A, T203M, S204A, T436A, and  
157 quadruple site mutation to alanine (4 Muts) were generated. We found that the level of O-  
158 GlcNAcylation was significantly reduced in the T203M and 4 Muts mutant variations *in vitro* (Fig.  
159 3E and F) and *in vivo* (Fig. 3G and H). However, changes in O-GlcNAcylation were insignificant  
160 for other MeCP2 mutants, suggesting that the T203 site is the predominant O-GlcNAcylation site  
161 on human MeCP2. Of note, the T203 site has previously been implicated in the pathogenesis of  
162 RTT. Interestingly, MeCP2-4Muts still showed a weak level of O-GlcNAcylation, which further  
163 supports our MS results showing multiple O-GlcNAcylation sites on MeCP2 (Fig. 1 and Fig. S1).

164 To interrogate the reversibility of MeCP2 O-GlcNAcylation, we introduced GST-tagged OGA  
165 (31-624) recombinant protein, which removes O-GlcNAc modifications. OGA almost completely  
166 removed the O-GlcNAcylation on MeCP2 *in vitro* (Fig. 3I-L), implying that MeCP2 O-  
167 GlcNAcylation is a reversible and dynamic process.

168

### 169 ***T203 O-GlcNAcylation is Required for Dendrite Development in Cultured Neurons***

170 To understand the functional importance of MeCP2 O-GlcNAcylation, we next examined its  
171 impact on neural development. Overexpression of MeCP2 inhibits dendritic growth of  
172 hippocampal neurons<sup>43, 44</sup>, and *MECP2* transgenic mice also appears to have a progressive  
173 neurological and neurobehavioral disorders<sup>19, 44, 45</sup>. If MeCP2 O-GlcNAcylation is involved in these  
174 aberrant neural developmental physiology, we reasoned that mutating O-GlcNAc sites in an

175 MeCP2 overexpression system may rescue the above observed defects. Thus, for our next  
176 experiments, we employed MeCP2 overexpression as an experimental model to test the  
177 significance of MeCP2 T203 O-GlcNAcylation for neural development.

178 First, we compared the morphological differences of dendritic branches of cultured mouse  
179 hippocampal neurons using anti-MAP2 immunofluorescent staining after infection with the  
180 indicated LV-GFP control or LV-hMeCP2 ectopic expression lentivirus (Fig. S3A). The total length  
181 of dendrites was significantly inhibited by overexpressing ectopic hMeCP2 compared with cells  
182 infected with the LV-GFP control virus ( $207.4 \pm 7.85 \mu\text{m}$  in LV-hMeCP2 and  $294.2 \pm 10.17 \mu\text{m}$  in  
183 LV-GFP control,  $p < 0.001$ ,  $n = 62$  and  $67$  neurons, respectively). However, overexpression of  
184 hMeCP2 T203M or hMeCP2-4Muts mutant had no significant effect on the length of total dendrite  
185 compared with LV-GFP control neurons ( $269.0 \pm 9.58 \mu\text{m}$  in LV-hMeCP2 T203M and  $263.6 \pm 8.81$   
186  $\mu\text{m}$  in LV-hMeCP2-4Muts, respectively;  $p = 0.1348$  and  $0.0829$ ,  $n = 63$  and  $56$  neurons,  
187 respectively) (Fig. S3B and C). In stark contrast, overexpression of the hMeCP2 O-GlcNAc mutant  
188 hMeCP2 S68A, S204A or T436A all had similar inhibitory effects on dendrite development as WT  
189 hMeCP2 ( $p < 0.001$ ,  $n = 70$ ,  $60$  and  $63$  neurons, respectively). These results suggest that T203M,  
190 but not S68A, S204A or T436A, specifically rescues the aberrant dendritic morphology seen with  
191 hMeCP2 overexpression. In addition, we also quantified the length of primary and secondary  
192 dendritic branches after overexpression of the indicated ectopic hMeCP2. As shown in Fig. S3D  
193 and E, overexpression of WT hMeCP2 significantly inhibited the length of both primary and  
194 secondary branches compared with LV-GFP controls ( $162.0 \pm 6.02 \mu\text{m}$  in LV-hMeCP2 and  $214.4$   
195  $\pm 6.56 \mu\text{m}$  in LV-GFP control for primary branches,  $p < 0.001$ ,  $n = 62$  neurons;  $31.3 \pm 3.70 \mu\text{m}$  in  
196 LV-hMeCP2 and  $71.4 \pm 5.87 \mu\text{m}$  in LV-GFP control for secondary branches,  $p < 0.001$ ,  $n = 27$   
197 neurons). Overexpression of hMeCP2 S68A, S204A and T436A also significantly decreased the  
198 length of primary branches ( $p < 0.001$ ,  $n = 58$ ,  $50$  and  $63$  neurons, respectively), but  
199 overexpression of MeCP2 T203M or MeCP2-4Muts mutant had no obvious effect on the length  
200 of both primary and secondary branches (Fig. S3D and E). The rescue effect seen with MeCP2



201 T203M and MeCP2-4Muts seen to be relatively specific, because overexpression of either S68A,  
202 S204A or T436A mutant inhibited neuronal dendrite development similar to overexpressed WT  
203 hMeCP2 (Fig. S3B-E). Together, these results indicate that O-GlcNAcylation of hMeCP2 T203  
204 critically underlies the dendritic deficits observed with overexpression of ectopic hMeCP2 in  
205 cultured hippocampal neurons, and mutating T203 rescues these deficits in dendritic length and  
206 branching.

207 To further illustrate the significance of MeCP2 O-GlcNAcylation in neural development, we  
208 tested whether T203 O-GlcNAcylation had any effects on dendritic spine morphogenesis in  
209 cultured hippocampal neurons. A lentiviral-based rescue (LEMPRA) construct was used to  
210 exogenously introduce Flag-tagged shRNA-resistant human *MECP2* to replace endogenous  
211 mouse *Mecp2*, the expression of which was specifically knocked down by shRNA<sup>24</sup> (Fig. 4A).  
212 Cultured hippocampal neurons from E17.5 mouse embryos were infected with the indicated  
213 lentivirus at DIV 7, then fixed at DIV 14 for immunofluorescent staining with the postsynaptic  
214 marker PSD-95 antibody (Fig. 4B) to evaluate the formation of dendritic spines (Fig. 4C). Efficient  
215 knockdown of endogenous mMeCP2 and expression of equivalent levels of exogenous hMeCP2  
216 were confirmed by Western blot analysis (Fig. S4). Consistent with previous reports showing  
217 smaller somas in *Mecp2*-null neurons<sup>11, 12</sup>, quantification revealed that the area of soma in  
218 shMeCP2 (mMeCP2-) neurons is dramatically reduced compared with FUGW-GFP control  
219 neurons ( $129.1 \pm 8.18 \mu\text{m}^2$  in mMeCP2-, and  $211.5 \pm 18.7 \mu\text{m}^2$  in FUGW-GFP control,  $p < 0.01$ ,  $n$   
220 = 22 and 15 neurons, respectively). Importantly, exogenous expression of WT hMeCP2 or  
221 hMeCP2 T436A ( $203.4 \pm 16.71 \mu\text{m}^2$  in mMeCP2-/hMeCP2+ and  $200.9 \pm 16.04 \mu\text{m}^2$  in mMeCP2-  
222 /hMeCP2 T436A+,  $p = 0.9904$  and  $0.9875$ , respectively, compared with FUGW-GFP control,  $n =$   
223 20 and 9 neurons, respectively), but not hMeCP2 T203M or hMeCP2-2Muts mutants ( $162.9 \pm$   
224  $8.43 \mu\text{m}^2$  in mMeCP2-/hMeCP2 T203M+ and  $143.9 \pm 9.49 \mu\text{m}^2$  in mMeCP2-/hMeCP2-2Muts+,  $p$   
225 =  $0.0348$  and  $0.0174$ , respectively, compared with FUGW-GFP control,  $n = 23$  and 9 neurons,  
226 respectively), efficiently rescued the smaller soma deficiency in mMeCP2- neurons (Fig. 4D).

227 In agreement with previous reports in *Mecp2*-null mice<sup>9, 46, 47</sup>, we found that the density of  
228 PSD-95 puncta was significantly decreased after knocking down endogenous MeCP2 ( $8.2 \pm 0.53$   
229 /10  $\mu\text{m}$  in mMeCP2- and  $17.0 \pm 0.56$  /10  $\mu\text{m}$  in FUGW-GFP control,  $p < 0.001$ ,  $n = 10$  neurons).  
230 Both exogenously expressed Flag-tagged WT hMeCP2 and hMeCP2 T436A mutants efficiently  
231 rescued the decrease in PSD-95 puncta after MeCP2 knockdown ( $16.9 \pm 0.39$  /10  $\mu\text{m}$  in  
232 mMeCP2-/hMeCP2+ and  $16.5 \pm 0.27$  /10  $\mu\text{m}$  in mMeCP2-/hMeCP2 T436A+,  $p = 0.9997$  and  
233  $0.8970$ , respectively, compared with FUGW-GFP control,  $n = 10$ ). Interestingly, in stark contrast,  
234 exogenously expressed hMeCP2 T203M and hMeCP2-2Muts both showed significantly  
235 decreased number of PSD-95 puncta compared with FUGW-GFP control neurons ( $8.4 \pm 0.52$  /10  
236  $\mu\text{m}$  in mMeCP2-/hMeCP2 T203M+ and  $8.5 \pm 0.37$  /10  $\mu\text{m}$  in mMeCP2-/hMeCP2-2Muts+,  $p < 0.01$   
237 and  $p < 0.01$ , respectively,  $n = 10$  neurons) (Fig. 4E), demonstrating an inability to rescue MeCP2  
238 knockdown-induced decrease in PSD-95. In addition, we also analyzed the average size of each  
239 PSD-95 puncta within the dendritic spines. We found that the PSD-95 puncta size was  
240 significantly decreased in mMeCP2- neurons compared to FUGW-GFP control neurons ( $0.312 \pm$   
241  $0.018 \mu\text{m}^2$  in mMeCP2-,  $n = 35$ ;  $0.432 \pm 0.026 \mu\text{m}^2$  in FUGW-GFP control,  $n = 38$ ;  $p = 0.001$ ).  
242 Ectopic expression of WT hMeCP2 and hMeCP2 T436A mutants both significantly rescued the  
243 decreased PSD-95-positive puncta size in mMeCP2- neurons to normal level compared with  
244 FUGW-GFP control neurons ( $0.466 \pm 0.027 \mu\text{m}^2$  in mMeCP2-/hMeCP2+,  $n = 37$ ;  $0.428 \pm 0.027$   
245  $\mu\text{m}^2$  in mMeCP2-/hMeCP2 T436A+,  $n = 34$ ;  $p = 0.738$  and  $0.999$ , respectively). However,  
246 exogenously expressed hMeCP2 T203M and hMeCP2-2Muts in mMeCP2- neurons both showed  
247 significantly decreased size of PSD-95-positive puncta compared with FUGW-GFP control  
248 neurons ( $0.270 \pm 0.019 \mu\text{m}^2$  in mMeCP2-/hMeCP2 T203M+,  $n = 37$ ;  $0.273 \pm 0.018 \mu\text{m}^2$  in  
249 mMeCP2-/hMeCP2-2Muts,  $n = 33$ ;  $p < 0.001$  and  $p < 0.001$ , respectively) (Fig. 4F). Together,  
250 these results suggest a requirement of T203 O-GlcNAcylation for dendritic spine morphogenesis.  
251 Taken together, our results indicate that hMeCP2 T203 O-GlcNAcylation is essential for the  
252 regulation of neurite outgrowth and dendritic spine morphogenesis in cultured hippocampal

253 neurons. Moreover, T203 O-GlcNAcylation is also sufficient for the maintenance of neuronal soma  
254 during neuronal differentiation *in vitro*.

255

### 256 ***T203 O-GlcNAcylation Promotes Cortical Neuron Migration and Maturation in vivo***

257 To further understand the role of T203 O-GlcNAcylation in cortical development *in vivo*, we  
258 manipulated the expression of exogenous human MeCP2 in the developing mouse neocortex  
259 using the above-described lentiviral-based rescue (LEMPRA) plasmid by *in utero* electroporation  
260 <sup>24, 48</sup>. Neuronal migration and dendritic differentiation are critical events in cortical construction.  
261 Therefore, we analyzed the effects of T203 O-GlcNAcylation on neuronal migration and dendritic  
262 spine morphogenesis at embryonic day 17.5 (E17.5) and postnatal day 15 (P15), respectively  
263 (Fig. 5A). First, we found that loss-of-function of MeCP2 by shRNA-mediated knockdown  
264 resulted in significant migration defects at E17.5 when compared with electroporation of only  
265 GFP (Fig. 5B and C). To exclude possible off-target effects of the shRNA system, we showed  
266 that the migration defects in MeCP2 knockdown neurons could be rescued by exogenous  
267 expression of WT hMeCP2. However, exogenous expression of the hMeCP2 T203M mutant  
268 could not rescue the migration defects in mMeCP2 knockdown neurons (Fig. 5B and C),  
269 indicating T203 O-GlcNAcylation is required for proper neuronal migration in the embryonic  
270 neocortex.

271 Previous studies has shown that the leading process (LP) branch is a critical determinant  
272 for nuclear translocation during neuronal migration <sup>49</sup>. Therefore, we analyzed the morphology  
273 and projection of LP in MeCP2 knockdown (mMeCP2-) and rescue neurons (mMeCP2-  
274 /hMeCP2+). Interestingly, we found that the length of LP in confirmed mMeCP2- neurons is much  
275 longer compared with FUGW-GFP control neurons ( $38.94 \pm 1.07 \mu\text{m}$  in mMeCP2- neurons and  
276  $18.18 \pm 0.62 \mu\text{m}$  in FUGW-GFP control neurons,  $p < 0.001$ ,  $n = 35$  and  $37$ , respectively).  
277 Moreover, the abnormal LP branches in confirmed mMeCP2- neurons can be significantly  
278 rescued by exogenous expression of WT hMeCP2, but not hMeCP2 T203M mutant ( $19.98 \pm$

279 0.49  $\mu\text{m}$  in mMeCP2-/hMeCP2+ neurons and  $42.76 \pm 1.53 \mu\text{m}$  in mMeCP2-/hMeCP2 T203M+  
280 neurons,  $p = 0.4528$  and  $p < 0.001$ , respectively, compared with FUGW-GFP control,  $n = 36$  and  
281 35, respectively) (Fig. 5D). Collectively, these results indicate that the abnormally developed LP  
282 branches may be responsible for the migration defects in mMeCP2- neurons, and that hMeCP2  
283 T203 O-GlcNAcylation is critical for maintaining normal LP branch morphology and the  
284 navigation of migrating neuronal precursors *in vivo*.

285 Dendritic spines have been showed to be abnormal in the cerebral cortex in RTT patients  
286 and *Mecp2*-null mice<sup>11, 13, 47, 50</sup>. Thus, we next asked whether MeCP2 T203 O-GlcNAcylation is  
287 essential for postnatal dendritic spine morphogenesis *in vivo*. First, we analyzed both dendrite  
288 and dendritic spine morphology in Layer II/III cortical projection neurons on P15 mice, which had  
289 been manipulated by *in utero* electroporation as described above on E13.5 (Fig. 5A). GFP  
290 fluorescence was used to trace the morphology of entire neurons, including the apical and basal  
291 dendritic arbors. Initial analysis did not find striking differences based on gross morphology of  
292 the dendrites including polarity and dendritic orientation in individual groups of electroporated  
293 neurons (Fig. 5E). Next, we imaged apical and basal dendritic segments at high magnification  
294 for each groups of electroporated neurons (Fig. 5E), and found that the density of both apical  
295 and basal spines were significantly decreased in mMeCP2- neurons compared with FUGW-GFP  
296 control neurons ( $1.118 \pm 0.065 /\mu\text{m}$  and  $1.13 \pm 0.041 /\mu\text{m}$  in mMeCP2- neurons;  $1.414 \pm 0.042$   
297  $/\mu\text{m}$  and  $1.37 \pm 0.054 /\mu\text{m}$  in FUGW-GFP control neurons,  $p = 0.0045$  and  $0.013$ , respectively,  $n$   
298 = 13)(Fig. 5F and G). Meanwhile, the spine formation defects in mMeCP2- neurons can be  
299 significantly rescued by ectopic expression of WT hMeCP2, but not by hMeCP2 T203M mutant  
300 ( $1.415 \pm 0.057 /\mu\text{m}$  and  $1.36 \pm 0.052 /\mu\text{m}$  in mMeCP2-/hMeCP2+ neurons, and  $0.831 \pm 0.052$   
301  $/\mu\text{m}$  and  $0.85 \pm 0.059 /\mu\text{m}$  in mMeCP2-/hMeCP2 T203M+ neurons,  $p = 0.99$  and  $p < 0.001$ ,  
302 respectively, compared with FUGW-GFP control neurons,  $n = 17$ ) (Fig. 5F and G).

303 Dendritic spines are morphologically heterogeneous within the neocortex, and these  
304 differences between spines reflect functional viability and pathological states<sup>51</sup>. To interrogate

305 the effect of hMeCP2 T203 O-GlcNAcylation on spine morphology, we next classified spine  
306 shapes into thin, mushroom, and stubby categories as previously defined<sup>52</sup>. We found  
307 significantly fewer mushroom spines in mMeCP2- neurons at P15, compared with FUGW-GFP  
308 control neurons ( $38.79 \pm 1.89$  % in mMeCP2- neurons and  $51.18 \pm 2.03$  % in FUGW-GFP control  
309 neurons,  $p = 0.001$ ,  $n = 17$  and  $38$ , respectively) (Fig. 5H). In contrast, no changes in spine  
310 morphology were observed in mMeCP2-/hMeCP2+ rescue neurons, compared with FUGW-GFP  
311 control neurons ( $48.76 \pm 2.27$  % in mMeCP2-/hMeCP2+ neurons and  $51.18 \pm 2.03$  % in FUGW-  
312 GFP control neurons,  $p = 0.9993$ ,  $n = 18$  and  $38$ , respectively). However, mMeCP2-/hMeCP2  
313 T203M+ neurons had significantly fewer mushroom spines with relatively increased number of  
314 stubby spines ( $41.96 \pm 2.31$  % mushroom type and  $48.50 \pm 3.11$  % stubby type in mMeCP2-  
315 /hMeCP2 T203M+ neurons;  $51.18 \pm 2.03$  % mushroom type and  $32.90 \pm 1.58$  % stubby type in  
316 FUGW-GFP control neurons,  $p = 0.0465$  and  $p < 0.001$ , respectively,  $n = 18$  and  $38$ , respectively)  
317 (Fig. 5H). Therefore, our results indicate that hMeCP2 T203 O-GlcNAcylation plays a critical role  
318 in the regulation of dendritic spine morphogenesis. Notably, the features displayed in mMeCP2-  
319 /hMeCP2 T203M+ cortical neurons nicely mimic the defects in dendrite and spine maturation  
320 and synaptogenesis in RTT patients<sup>11, 13, 50, 53</sup>.

321

### 322 ***T203 O-GlcNAcylation Regulates Excitatory Synaptic Transmission***

323 Previous studies have shown that shRNA-mediated MeCP2 knockdown affects homeostatic  
324 synaptic plasticity in hippocampal neurons<sup>54, 55</sup>. Long-term potentiation (LTP) is also impaired at  
325 excitatory synapses of layers II/III and V in the primary somatosensory cortex of *Mecp2*-null  
326 mutant mice<sup>56, 57</sup>. However, the bases of these deficits remain unclear. To investigate whether  
327 synaptic transmission is regulated by hMeCP2 T203 O-GlcNAcylation, we treated neurons in  
328 layers II/III of the developing cortex with various LEMPRA constructs using *in utero* electroporation,  
329 and recorded from GFP-positive neurons on P21 (Fig. 6A). First, we recorded miniature excitatory  
330 postsynaptic currents (mEPSCs) in FUGW-GFP control and mMeCP2- projection neurons (Fig.

331 6B and 6C). The mEPSC amplitudes remained similar between mMeCP2- neurons and FUGW-  
332 GFP control neurons ( $10.23 \pm 0.57$  pA in FUGW-GFP control,  $n = 10$  neurons, and  $11.24 \pm 0.26$   
333 pA in mMeCP2-,  $n = 9$  neurons,  $p = 0.7859$ ). Exogenous expression of WT or T203M mutant  
334 hMeCP2 in mMeCP2- neurons has no significant effect on the mEPSC amplitudes ( $12.71 \pm 0.77$   
335 pA in mMeCP2-/hMeCP2+,  $n = 10$  neurons, and  $12.59 \pm 0.88$  pA in mMeCP2-/hMeCP2 T203M+,  
336  $n = 8$  neurons, compared with FUGW-GFP control neurons,  $p = 0.0939$  and  $0.1793$ , respectively)  
337 (Fig. 6D and 6E). In contrast, in agreement with the decreased dendritic spine density in  
338 mMeCP2- neurons (Fig. 4E, 5F and 5G) and previous report <sup>47</sup>, the mEPSC frequency  
339 significantly decreased from  $3.00 \pm 0.26$  Hz in FUGW-GFP control neurons to  $1.62 \pm 0.11$  Hz in  
340 mMeCP2- neurons ( $n = 10$  and  $9$  neurons respectively,  $p = 0.0048$ ) (Fig. 6F and 6G). In addition,  
341 the reduced frequency of mEPSCs in mMeCP2- neurons was efficiently rescued by exogenous  
342 expression of WT hMeCP2, but not the hMeCP2 T203M mutant ( $2.81 \pm 0.26$  Hz in mMeCP2-  
343 /hMeCP2+,  $n = 10$  neurons, compared with FUGW-GFP control neurons,  $p > 0.9999$ ;  $1.66 \pm 0.12$   
344 Hz in mMeCP2-/hMeCP2 T203M+,  $n = 8$  neurons, compared with FUGW-GFP control and  
345 mMeCP2-/hMeCP2+ neurons,  $p = 0.0093$  and  $0.0259$ , respectively) (Fig. 6F and 6G), further  
346 indicating that T203 O-GlcNAcylation is involved in the regulation of postsynaptic spine density  
347 and excitatory synaptic transmission *in vivo*.

348 Interestingly, both the amplitude and the frequency of miniature inhibitory postsynaptic  
349 currents (mIPSCs) were not significantly different between mMeCP2- neurons and FUGW-GFP  
350 control neurons (amplitude:  $15.63 \pm 1.07$  pA in mMeCP2-,  $n = 9$  neurons, and  $15.01 \pm 1.15$  pA in  
351 FUGW-GFP control,  $n = 10$  neurons,  $p > 0.9999$ ; frequency:  $2.455 \pm 0.31$  Hz in mMeCP2-,  $n = 9$   
352 neurons, and  $2.426 \pm 0.31$  Hz in FUGW-GFP control,  $n = 10$  neurons,  $p > 0.9999$ ) (Fig. 6H-L).  
353 Moreover, neither amplitude nor frequency of mIPSCs was changed in mMeCP2-/hMeCP2+ or  
354 mMeCP2-/hMeCP2 T203M+ neurons compared with FUGW-GFP control neurons (amplitude:  
355  $16.85 \pm 1.56$  pA in mMeCP2-/hMeCP2+,  $n = 9$  neurons,  $p > 0.9999$ , and  $14.61 \pm 0.89$  pA in  
356 mMeCP2-/hMeCP2 T203M+,  $n = 11$  neurons,  $p > 0.9999$ ; frequency:  $2.209 \pm 0.38$  Hz in mMeCP2-

357 /hMeCP2+, n = 9 neurons, p > 0.9999, and 1.811 ± 0.36 Hz in mMeCP2-/hMeCP2 T203M+, n =  
358 11 neurons, p = 0.8159) (Fig. 6H-L). Together, these results indicate that T203M O-GlcNAcylation  
359 may be essential for the establishment of excitatory, but not inhibitory, synaptic transmission  
360 during neurodevelopment in the cortex.

361

### 362 **Neuronal Activity-Induced *Bdnf* Transcription is Dependent on T203 O-GlcNAcylation**

363 MeCP2 regulates the expression of thousands of genes during neural development. One of  
364 the most important target genes is brain-derived neurotrophic factor (BDNF)<sup>21, 22, 24</sup>. Numerous  
365 studies have shown that BDNF is critical for dendritic spine morphogenesis, synaptic maturation,  
366 and synaptic plasticity<sup>58, 59, 60, 61</sup>. Moreover, activity-induced release of BDNF modulates spine  
367 morphology in conjunction with spontaneous neurotransmitter release<sup>59</sup>. Therefore, we asked  
368 whether the impaired dendritic branching, spine morphogenesis and synaptic transmission  
369 observed in mMeCP2-/hMeCP2 T203M+ neurons were due to impaired *Bdnf* transcription. To  
370 evaluate the effect of T203 O-GlcNAcylation on neuronal activity-induced *Bdnf* transcription,  
371 primary mouse cortical neurons were dissected from E15.5 embryos and infected with various  
372 LEMPRA lentivirus constructions as described above (Fig. 4A) at DIV 3 for 4 days. We then  
373 added tetrodotoxin (TTX), a sodium channel selective blocker, into the culture medium at a final  
374 concentration of 1 μM to block the production of action potentials for 12 hr. On DIV 8, the cultured  
375 cortical neurons were treated with potassium chloride (KCl) at a final concentration of 55 mM for  
376 5 hr to trigger synchronous membrane depolarization<sup>22, 62, 63</sup>. The neurons were then harvested  
377 for RNA extraction and real time quantitative RT-PCR assay to investigate the transcription of  
378 MeCP2 target genes (Fig. 7A).

379 The transcription of total mouse *Bdnf* and its exon IV, but not exon VI, was dramatically  
380 enhanced by more than 4-fold in FUGW-GFP cortical neurons after KCl treatment (p < 0.001, n  
381 = 3) (Fig. 7B-D). The upregulation of total *Bdnf* and exon IV mRNA transcription were significantly  
382 lower in mMeCP2- neurons compared with FUGW-GFP control neurons after treatment with KCl

383 (p < 0.001 and p < 0.001, respectively, n = 3) (Fig. 7B and C). Interestingly, the compromised  
384 upregulation of *Bdnf* transcription in mMeCP2- neurons could be significantly rescued by  
385 exogenous expression of WT hMeCP2 and hMeCP2 T436A mutant (p = 0.1015 and 0.1158,  
386 respectively, n = 3), but not with hMeCP2 T203M or hMeCP2-2Muts mutants (p < 0.001 and p <  
387 0.001, respectively, n = 3) (Fig. 7B and C). These results suggest that T203 O-GlcNAcylation of  
388 hMeCP2 is essential for neuronal activity-induced enhanced transcription of *Bdnf*, especially for  
389 exon IV, but not exon VI. In addition, we examined the transcription of *Acta2*, a downstream gene  
390 normally repressed by MeCP2 in cortical neurons<sup>43</sup>. We found that *Acta2* mRNA level was  
391 significantly upregulated in mMeCP2- neurons in both absence and presence of KCl treatment  
392 conditions (p < 0.001, n = 3) (Fig. 7E). Exogenous expression of WT hMeCP2 could significantly  
393 suppress the upregulated transcription of *Acta2* in mMeCP2- neurons, but hMeCP2 T203M and  
394 hMeCP2-2Muts failed to reverse the transcriptional activation effect in mMeCP2- neurons (p >  
395 0.9999 and p < 0.001, respectively, n = 3) (Fig. 7E), indicating that T203 O-GlcNAcylation of  
396 hMeCP2 is also required to suppress *Acta2* transcription. These results suggest that hMeCP2  
397 T203 O-GlcNAcylation is particularly important for activity-induced *Bdnf* expression in cortical  
398 neurons.

399 Finally, we performed chromatin immunoprecipitation (ChIP) analysis to quantify and  
400 compare the binding affinity of WT hMeCP2 and various hMeCP2 mutants to the mouse *Bdnf* IV  
401 promoter in mouse Neuro2A cells (Fig. 7F and G). As expected, binding of MeCP2 to the *Bdnf*  
402 IV promoter was significantly decreased in mMeCP2- cells (Fig. 7H). Exogenous expression of  
403 either WT hMeCP2 or hMeCP2 T436A mutant dramatically rescued the binding deficiency in  
404 mMeCP2- cells (p = 0.013 and 0.5981, respectively, compared with FUGW-GFP control cells, n  
405 = 3). In contrast, both hMeCP2 T203M and hMeCP2-2Muts failed to rescue the decreased  
406 binding of *Bdnf* promoter IV in mMeCP2- cells (p = 0.0004 and < 0.001, respectively, compared  
407 with FUGW-GFP control cells, n = 3) (Fig. 7H), suggesting decreased binding capacity of  
408 hMeCP2 T203M, but not T436A, to *Bdnf* promoter IV. Taken together, these results indicate that



409 MeCP2 directly controls mouse *Bdnf* transcription by binding to the promoter IV. T203 O-  
410 GlcNAcylation on hMeCP2 is required to maintain *Bdnf* IV promoter binding, and therefore plays  
411 a critical role in the upregulation of *Bdnf* transcription following neural activation.

412

## 413 **DISCUSSION**

414 Collectively, our results indicate that O-GlcNAcylation on hMeCP2 at T203 is critical for  
415 dendritic growth, spine formation, baseline and induced synaptic transmission, and the  
416 regulation of activity-induced *Bdnf* transcription. Using a LEMPRA-based shRNA system with  
417 exogenous expression of various hMeCP2 O-GlcNAc site mutants, we demonstrated that O-  
418 GlcNAcylation regulates MeCP2 activity during neurodevelopment, and pinpointed T203 as a  
419 major novel PTM site for O-GlcNAc modification on hMeCP2. Given that T203 mutations were  
420 previously implicated in clinical cases of RTT <sup>37, 38, 39</sup>, these results suggest that hMeCP2 T203  
421 O-GlcNAcylation not only supports normal cortical neurodevelopment, but its deregulation may  
422 contribute to the pathogenesis of RTT.

423 Mutations of the *MECP2* gene are the most prevalent cause of RTT, and some mutated  
424 sites are substrates for PTM <sup>38, 64, 65, 66</sup>. This suggests that PTMs are a potentially crucial  
425 component of maintaining normal MeCP2 function, and deregulation may result in  
426 neurodevelopmental pathologies. Extensive studies have previously shown that phosphorylation  
427 <sup>21, 22, 23, 24</sup>, acetylation <sup>67, 68</sup>, SUMOylation <sup>64</sup> and other types of PTMs <sup>38</sup> can control MECP2  
428 function, suggesting diverse forms of regulation.

429 Of particular interest was the finding that rat MeCP2 proteins are O-GlcNAcylated <sup>35, 36</sup>, but  
430 its functional significance and mechanism was unclear. Previous results have implicated O-  
431 GlcNAcylation in the pathogenesis of neurodegenerative diseases <sup>69, 70</sup>. For example, the  
432 imbalance of O-GlcNAcylation relative to phosphorylation on microtubule-associated protein Tau  
433 may be highly involved in the pathogenesis of Alzheimer's disease <sup>71</sup>. In addition, OGT-mediated  
434 O-GlcNAcylation modulates both the maturity and function of excitatory synapses in the

435 developing brain<sup>72</sup>, and changes in OGT levels may contribute to synaptic plasticity deficits  
436 during brain aging<sup>34</sup>. Here, our results further illustrate a novel role for O-GlcNAcylation as a  
437 regulator of MeCP2 function during neurodevelopment. In particular, we identified T203 as a  
438 critical site for the establishment and maintenance of normal dendritic and spine development  
439 and synaptic transmission, in that exogenous expression of its mutant form T203M was not able  
440 to rescue deficits seen with knockdown of mouse endogenous MeCP2, whereas rescue effects  
441 were observed with other putative O-GlcNAcylation sites including S68, S204 and T436. The  
442 unique role of T203 may be due to its location on the human MeCP2 protein. MeCP2 can be  
443 subdivided into five domains corresponding to the N-terminal domain (NTD), the methyl-CpG  
444 binding domain (MBD), the intervening domain (ID), the transcriptional repression domain (TRD),  
445 and the C-terminal domain (CTD). By analyzing the *MECP2* mutation database, Bellini et al.  
446 have reported that about 25% of residues in the CTD and ID have been associated with  
447 pathogenic missense mutations in RTT<sup>38, 73</sup>. In addition, the ID domain has been shown to be  
448 involved in MeCP2-mediated multiple protein-protein interactions as well as diverse  
449 phosphorylation events<sup>73</sup>. Interestingly, T203 is located within the ID domain (Fig. 1B). Therefore,  
450 it is possible that the O-GlcNAcylation on T203 may affect its binding to DNA or its protein  
451 partners, resulting in subsequent regulation of neurodevelopment. However, the precise  
452 biological partners of T203 remain to be further identified. Our results showed that the T203M  
453 mutation had no effect on its binding to histone deacetylase 1 (HDAC1) (Fig. S5), but did result  
454 in reduced binding to the *Bdnf* IV promoter (Fig. 7). This suggests an HDAC1-independent  
455 transcriptional activation mechanism may underlie T203 O-GlcNAcylation in cortical neurons.

456 Although increasing evidence points to O-GlcNAcylation as a mediator of  
457 neurodegeneration and a modulator of neuronal signaling pathways in the brain<sup>27, 32, 71, 74, 75, 76,</sup>  
458 <sup>77, 78, 79</sup>, the underlying molecular mechanisms that support these crucial functions are not yet  
459 fully understood. Previously, the O-GlcNAcylation of CREB, a common upstream regulator of  
460 *Bdnf*, was found to critically regulate neuronal gene expression, axonal and dendritic growth,

461 and long-term memory <sup>76, 79</sup>. MeCP2 associates with CREB1 at the promoter of an activated  
462 target but not a repressed target <sup>80</sup>. In addition, CREB signaling has also recently been shown  
463 to be involved in Rett syndrome pathogenesis <sup>81</sup>. Interestingly, hMeCP2 T203 O-GlcNAcylation,  
464 but not its T203M mutant was able to rescue the activity-dependent *Bdnf* transcription (Fig. 7B).  
465 Because T203M dramatically reduces O-GlcNAcylation of hMeCP2, it suggests that O-  
466 GlcNAcyated T203 is necessary to support *Bdnf* transcription following neural depolarization.  
467 Interestingly, T203M did not notably impact *Creb* expression levels following KCl treatment (data  
468 not shown). This suggests that neuronal activation stimulates a variety of responses at both the  
469 O-GlcNAcylation PTM level and gene expression level to control neural development. First, both  
470 MeCP2 and CREB proteins are dynamically regulated via O-GlcNAcylation to stimulate normal  
471 dendrite and spine growth <sup>76</sup>. Second, neural activity may result in the increased association of  
472 the MeCP2 and CREB1 <sup>80</sup>, and the coupling between T203 O-GlcNAcyated MeCP2 with *Bdnf*  
473 exon IV, as well as the dissociation between phosphorylated MeCP2 with the *Bdnf* exon III  
474 promoter to promote *Bdnf* transcription <sup>21</sup>. Together, our data and previous results indicate that  
475 upon neuronal activation, O-GlcNAcylation of MeCP2 upregulates the CREB-BDNF signaling  
476 pathway *via* multiple mechanisms to promote neural development and synaptic plasticity, with  
477 T203 as a direct binding partner of the *Bdnf* promoter.

478 Given the prevalence of PTMs on MeCP2, it is interesting to further consider the role of O-  
479 GlcNAc among other forms of PTM, especially in the context of RTT. Thus far, the best  
480 characterized PTM of MeCP2 protein is its phosphorylation <sup>21, 22, 23, 24</sup>, and deregulation of MeCP2  
481 phosphorylation may be involved in the pathogenesis of RTT <sup>65, 66</sup>. Interestingly, O-GlcNAcylation  
482 has been closely linked to phosphorylation as both modifications can occur at the same or  
483 adjacent sites <sup>82</sup>, and functional interaction between both modifications has also been previously  
484 characterized <sup>83</sup>. However, in this study our MS assay did not identify the O-GlcNAc site T203  
485 also as a phosphorylation site (Fig. 1 and Fig. S1), suggesting that the observed  
486 neurodevelopmental regulatory effects are likely due to O-GlcNAcylation on T203, rather than

487 phosphorylation. In addition, we analyzed the effects of T203M deglycosylation on the  
488 phosphorylation of MeCP2 S421 and S80<sup>22, 23</sup>, but did not find any significant changes in  
489 phosphorylation level on either site (Fig. S6). Thus, it is possible that T203 O-GlcNAcylation  
490 affects neural development and activity-dependent transcription by independently recruiting a  
491 specific set of molecular coactivator to target gene promoters. Given the complexity of various  
492 genetic mutations in the pathogenesis of RTT<sup>38, 84</sup>, and that some mutations impact PTM sites  
493<sup>38</sup>, delineating the effects of disease-related PTM sites and their interaction may lead to novel  
494 therapeutic targets for reversing neural deficiencies in RTT.

495 In this study, we identified several previously unknown O-GlcNAcylation sites in human  
496 MeCP2 and revealed novel functions of T203 O-GlcNAc modification in the regulation of neural  
497 development and synaptic transmission. Furthermore, we provided mechanistic insight into  
498 downstream signaling of MeCP2 T203 O-GlcNAcylation, adding to our understanding of the  
499 complex signaling network following MeCP2 PTMs in mediating neuronal activity-dependent  
500 transcription. Future work will need to further map out major relevant molecular pathways  
501 affected by MeCP2 T203 O-GlcNAcylation and their possible involvement in the pathogenesis  
502 of RTT disorders.

## 503 **Materials and Methods**

### 504 ***Animals***

505 Pregnant ICR mice were purchased from SiBeiFu Co. (Beijing, China) and housed in the  
506 animal breeding facility of the Beijing Institute of Basic Medical Sciences. All animals were  
507 maintained and utilized in accordance with the guidelines of the Institutional Animal Care and  
508 Use Committee of the Beijing Institute of Basic Medical Sciences. *MECP2* Tg mice (JAX lab,  
509 #008679)<sup>19</sup> were kindly provided by Dr. Zilong Qiu at the Institute of Neuroscience, Chinese  
510 Academy of Sciences. *MECP2* Tg mice genotypes were determined by PCR assays using  
511 murine tail DNA, with primers as follows: 5'-CGCTCCGCCCTATCTCTGA-3' (forward) and 5'-  
512 ACAGATCGGATAGAAGACTC-3' (reverse).

513

### 514 ***Plasmids***

515 The rat *Mecp2* gene expression plasmid was a gift from Dr. Zilong Qiu at the Institution of  
516 Neuroscience, Chinese Academy of Sciences. The human *MECP2-e1* gene expression plasmid  
517 was a gift from Dr. Keping Hu at Chinese Academy of Medical Sciences & Peking Union Medical  
518 College. N-terminal HA-tagged *MECP2* and GFP-tagged *MECP2* CDS were subcloned into the  
519 pXJ40-HA and pEGFP-C1 vector, respectively. Other constructs of various *MECP2* mutations  
520 and indicated truncations were all generated based on the recombinant pXJ40-HA-hMeCP2 or  
521 pEGFP-hMeCP2 constructs. N-terminal His-tagged *MECP2* and GST-tagged *MECP2* CDS were  
522 subcloned into the pET-28a and pGEX-6P-1 vector, respectively. GST-tagged full length OGT  
523 was subcloned into the pET-28a plasmid. GST-OGT (323-1041) and GST-OGA (31-624)  
524 plasmids were gifts from Dr. Huadong Pei at National Center for Protein Sciences (Beijing). The  
525 PCR primers used for subcloning of truncated or mutant MeCP2 and OGT were listed in  
526 supplemental Table S3.

527 The MeCP2 LEMPRA (lentivirus-mediated protein-replacement assay) plasmid (named  
528 *pLenti-FUGW-shMeCP2-GFP-IRES-Flag-MECP2*) is a lentiviral vector with dual promoters. It

529 was constructed by inserting the H1 promoter-driven mouse *Mecp2*-specific shRNA cassette  
530 against the sequence of 5'GTCAGAAGACCAGGATCTC-3' into the indicated site <sup>85</sup>, and  
531 inserting Flag-tagged shRNA-resistant human *MECP2* coding sequence under the control of the  
532 Ubiquitin-C (Ubc) promoter. The shRNA-resistant Flag-*MECP2* was generated by introducing  
533 five silent nucleotide mutations indicated in the following lower case letters within the coding  
534 sequence of *MECP2*: 5'- GagcGAAGACCAaGAcCTC-3' <sup>24</sup>.

535

### 536 ***Cell culture and DNA transfection***

537 HEK293T and Neuro2A cells were cultured in DMEM basic (Gibco, C11995500BT) and  
538 MEM basic (Gibco, C11095500BT) medium, respectively, supplemented with 10% FBS (Gibco,  
539 10099-141C), 100 U/mL penicillin-streptomycin (Gibco, 15140122), in a 37°C incubator with a  
540 humidified, 5% CO<sub>2</sub> atmosphere. Lipofectamine 2000 (Invitrogen, 11668019) was used for  
541 transfection following the manufacturer's protocol.

542

### 543 ***Mass spectrometry***

544 HA-MeCP2 was ectopically expressed in HEK293T cells. Proteins were isolated by co-IP,  
545 and eluted using 200 µg/ml of HA peptide. The endogenous mouse MeCP2 was enriched by co-  
546 IP with anti-MeCP2 antibody (Cell Signaling Technology, 3456) and subjected to Sodium  
547 dodecyl sulfate-polyacrylamide gel electrophoresis (SDS-PAGE). The gel was stained with  
548 Coomassie brilliant blue. Visualized bands were excised, de-stained with ammonium  
549 bicarbonate buffer, and dehydrated in 75% acetonitrile. Following rehydration (with 50 mM  
550 ammonium bicarbonate), the gel slices were crushed and subjected to overnight digestion with  
551 trypsin or chymotrypsin. The peptides were extracted with acetonitrile containing 0.1% formic  
552 acid and vacuum dried. Proteolytic peptides were reconstituted with mobile phase A (2%  
553 acetonitrile containing 0.1% formic acid) and then separated on an on-line C18 column (75 µm  
554 inner diameter, 360 µm outer diameter, 10 cm, 3 µm C18). Mobile phase A consisted of 0.1%

555 formic acid in 2% acetonitrile and mobile phase B was 0.1% formic acid in 84% acetonitrile. A  
556 linear gradient from 3 to 100% B over 75 minutes at a flow rate of 350 nL/min was applied.  
557 Mass spectrometry analysis was carried out on a Q-Exactive mass spectrometer (Thermo  
558 Fisher, SJ) operated in data dependent scan mode. Survey scan (m/z 375–1300) was  
559 performed at a resolution of 60,000 followed by MS2 scans to fragment the 50 most abundant  
560 precursors with collision induced dissociation. The activation time was set at 30 ms, the isolation  
561 width was 1.5 amu, the normalized activation energy was 35%, and the activation q was 0.25.

562 Mass spectrometry raw files were scanned and analyzed with the Proteome Discoverer  
563 software (version 2.1, Thermo Fisher Scientific) using MASCOT search engine with percolator  
564 against the human or rodent ref-sequence protein database. The mass tolerance was set to 20  
565 ppm for precursor and 0.5 Da for product ion. Missed cleavages were no more than two for  
566 each peptide. O-GlcNAc of Ser/Thr were used as variable modifications.

567

#### 568 ***In vitro O-GlcNAcylation assay by chemoenzymatic labelling***

569 Chemoenzymatic labelling and biotinylation of proteins in cell lysates were carried out  
570 following the manufacturer's instructions. Briefly, WT and *MECP2* Tg mice brain lysates (200 µg)  
571 were labelled using the Click-iT O-GlcNAc Enzymatic Labelling System (Molecular Probes,  
572 C33368) protocol, then conjugated with an alkyne-biotin compound according to the Click-iT  
573 Protein Analysis Detection Kit (Molecular Probes, C33372) protocol. A parallel negative control  
574 experiment was performed in the absence of the labelling enzyme GalT or UDP-GalNAz. The  
575 methanol and chloroform were used to precipitate the biotinylated lysates. The biotinylated  
576 products were solubilized using 1% SDS solution, and neutralized with the neutralization buffer  
577 (6% Nonidet P40, 100 mM Na<sub>2</sub>HPO<sub>4</sub>, 150 mM NaCl, 50 mM Tris-HCl, pH 7.5, and protease  
578 inhibitor cocktail). Lysates were then incubated with streptavidin resin with end-to-end rotation at  
579 4°C overnight. Resin was then washed five times with low-salt buffer (100 mM Na<sub>2</sub>HPO<sub>4</sub>, 150 mM  
580 NaCl, 0.1% SDS, 1% Triton X-100, 0.5% sodium deoxycholate) and five times with high-salt buffer

581 (100 mM Na<sub>2</sub>HPO<sub>4</sub>, 500 mM NaCl, 0.2% Triton X-100). Biotinylated proteins were boiled with SDS  
582 loading buffer and then resolved with SDS-PAGE and subjected to Western blot analysis using  
583 anti-MeCP2 antibody (Cell Signaling Technology, 3456). To quantify the level of O-GlcNAcylation,  
584 the intensity of the total MeCP2 protein band (Input) and the O-GlcNAc MeCP2 protein band  
585 (Elution) were measured, and the ratio of the intensity of the O-GlcNAc protein versus the intensity  
586 of the total protein was taken as the level of O-GlcNAcylation<sup>86</sup>.

587

### 588 ***Primary culture of cortical neurons***

589 Cortical neurons and hippocampal neurons were dissected and cultured from E15.5 and  
590 E17.5 embryonic mouse brain respectively, and neurons were maintained in Neurobasal medium  
591 (Gibco, 21103-049) supplemented with 2% B27 (Gibco, 17504044) and 1 mM GlutaMAX (Gibco,  
592 35050061), and 100 U/mL penicillin-streptomycin (Gibco, 15140122). Cells were typically  
593 seeded at a density of 1-3 x 10<sup>5</sup> cells/cm<sup>2</sup> on dishes coated with poly-L-lysine (Sigma-Aldrich,  
594 P1524). Neuronal cultures were treated overnight in 1 μM tetrodotoxin (TTX) (Kangte Biotech,  
595 purity > 99%; 121206) to reduce endogenous neuronal activity prior to stimulation. Neurons were  
596 membrane depolarized with 55 mM extracellular KCl as previously described<sup>21</sup>.

597

### 598 ***Lentivirus package and purification***

599 Lentiviruses were produced by co-transfection of HEK293T cells with the MeCP2 LEMPRA  
600 plasmid and the helper plasmids psPAX2 and VSV-G. Lentiviruses were concentrated by ultra-  
601 centrifugation 48-72 hr after transfection, and viral titers were determined by infection of  
602 HEK293T cells and determined by qPCR. Primary cultured neurons were infected with the  
603 purified lentivirus at appropriate time at 1 X 10<sup>6</sup> TU/mL.

604

### 605 ***Real time quantitative RT-PCR***

606 Total RNA was extracted using TRIzol (Invitrogen, 15596018). 0.5 μg of RNA was used for  
607 reverse transcription using the Reverse Transcription System (TaKaRa, RR036) according to the



608 manufacturer's protocol. Real-time PCR was conducted in triplicates employing SYBR Green  
609 PCR master mix (CW BIO, CW2601) with the appropriate forward and reverse primers. For  
610 quantitative analysis of gene expression, results were averaged from three replicates in three  
611 independent experiments. Values were normalized to *Actb* levels. All PCR reactions were  
612 performed in triplicate with the following primers. *Bdnf* total: 5'-  
613 TGCCTAGATCAAATGGAGCTTCTC-3' (Forward) and 5'-CCGATATGTACTCCTGTTCTTCAGC-3'  
614 (Reverse); *Bdnf* exon IV: 5'-CAGAGCAGCTGCCTTGATGTT-3' (Forward) and 5'-  
615 GCCTTGCCGTGGACGTTTA-3' (Reverse); *Bdnf* exon VI: 5'-GGGATCCGAGAGCTTTGTGTGGA-  
616 3' (Forward) and 5'-GTAGGCCAAGTTGCCTTGTCCTG-3' (Reverse); *Acta2*: 5'-  
617 GAGCTACGAACTGCCTGACG-3' (Forward) and 5'-TACCCCTGACAGGACGTTG-3' (Reverse);  
618 *Actb*: 5'-GGCTGTATTCCCCTCCATCG-3' (Forward) and 5'-CCAGTTGGTAACAATGCCATGT-3'  
619 (Reverse).

620

### 621 ***Expression and purification of recombinant proteins***

622 Both His-tagged and GST-tagged proteins were expressed in *Escherichia coli* BL21.  
623 Bacteria were treated with 0.1 mM Isopropyl  $\beta$ -D-thiogalactoside (IPTG) (Thermo Fisher,  
624 AM9462) at 16°C for 16 hr to induce protein expression. To purify the His-tagged recombinant  
625 protein, the induced bacteria were harvested and suspended in 10 mM PBS (pH 7.4) containing  
626 20 mM imidazole (Sigma-Aldrich, I2399) and 1 mM Phenylmethanesulfonyl fluoride (PMSF)  
627 (Sigma-Aldrich, 10837091001), followed by ultrasonication. The recombinant protein in the  
628 supernatant was incubated with the Ni Magnetic beads for 2 hr at 4°C, washed in 10 mM PBS  
629 (pH 7.4) three times, eluted with 10 mM PBS (pH 7.4) containing 200 mM iminazole, and followed  
630 by dialysis with 10 mM PBS (pH 7.4). Quantification of protein amount was measured by  
631 Coomassie brilliant blue staining.

632 To purify GST-tagged recombinant proteins, induced bacteria were harvested and  
633 suspended in 10 mM PBS (pH 7.4) containing 1 mM PMSF, followed by ultrasonication.

634 Recombinant GST-tagged protein in the supernatant was purified using glutathione-Sepharose  
635 4B beads (GE Healthcare, 17-0756-01), washed in 10 mM PBS (pH 7.4) three times, eluted with  
636 10 mM PBS (pH 7.4) containing 20 mM reduced glutathione, and followed by dialysis with 10  
637 mM PBS (pH 7.4). Quantification of the protein amount was measured by Coomassie brilliant  
638 blue staining.

639

#### 640 ***In vitro O-GlcNAcylation assay***

641 Purified recombinant GST-OGT fusion protein (323-1041) was incubated with wild type His-  
642 tagged recombinant hMeCP2 or various His-tagged hMeCP2 mutants in 50  $\mu$ L reactions (50 mM  
643 Tris-HCl, 12.5 mM MgCl<sub>2</sub>, 2 mM UDP-GlcNAc 1 mM DTT, pH 7.5) for overnight at 37°C, and  
644 Western blot analysis was carried out with anti-O-GlcNAc (RL2) antibody (Abcam, ab2739). For  
645 O-GlcNAc cleavage assay, O-GlcNAcylated proteins were treated with purified recombinant  
646 GST-OGA (31-624) fusion protein for 2 hr at 37°C in a volume of 50  $\mu$ L, and Western blot analysis  
647 was carried out with anti-O-GlcNAc (RL2) antibody (Abcam, ab2739). Quantitative analysis of  
648 recombinant protein was measured by Coomassie brilliant blue staining <sup>42</sup>.

649

#### 650 ***GST Pull-down assay***

651 Bacteria-expressed GST, GST-hMeCP2 or GST-OGT fusion proteins were immobilized on  
652 glutathione Sepharose 4B beads (GE Healthcare, 17-0756-01) and washed three times with  
653 GST binding buffer (50 mM Tris-HCl, pH 7.5, 100 mM NaCl, 50 mM NaF, 2 mM EDTA, 1%  
654 Nonidet P40, and protease inhibitor cocktail) . The beads were next incubated with His-hMeCP2  
655 or His-OGT recombinant protein lysates at 4°C for 4 hr under rotation. Beads were washed with  
656 GST binding buffer (50 mM Tris-HCl, pH 7.5, 100 mM NaCl, 50 mM NaF, 2 mM EDTA, 1%  
657 Nonidet P40, and protease inhibitor cocktail) and proteins were eluted, followed by Western blot  
658 with indicated antibodies.

659

660 ***Co-immunoprecipitation (Co-IP) assay***

661 For endogenous co-IP assay, mouse brain lysates or cell lysates (1-2 mg) with protease  
662 inhibitor cocktail were incubated with anti-MeCP2 (Cell Signaling Technology, 3456) or anti-OGT  
663 (Sigma-Aldrich, HPA030751) antibody overnight at 4°C. After incubation, protein-A/G agarose  
664 beads were used for precipitation for 2 hr. The precipitates were then washed 5 times with the  
665 lysis buffer and eluted by boiling in SDS sample buffer for Western blotting. The gel was  
666 transferred to PVDF membrane, and the membrane was blocked with 5% milk in TBST buffer  
667 for 1 hr (at room temperature). It was then incubated overnight at 4°C with antibody, washed  
668 three times in TBST, and the signals were revealed by HRP reaction using the SuperSignal  
669 Chemiluminescent Substrate (Beyotime, P0018AS).

670 For co-IP in HEK293T cells, HEK293T cells were plated on 60 mm plates, and transfection  
671 was performed when the cells reached 50% confluence. Lipofectamine 2000 was used for  
672 transfection. A total of 5 µg of DNA was used in 60 mm plates at a molar ratio of 1:1 for GFP-  
673 tagged and HA-tagged constructs. Cells were harvested 36 hr later. The cells were rinsed with  
674 cold PBS, harvested, and lysed for 20 min at 4°C in a modified RIPA lysis buffer. 10% of the  
675 supernatant was saved for the input control, and the rest was incubated with 2 µg anti-HA  
676 antibody (Cell Signaling Technology, 3724) or anti-GFP (Cell Signaling Technology, 2955)  
677 overnight at 4°C. The immune complex was isolated by addition of 30 ml of a 50% slurry of mixed  
678 protein-A/G agarose for 2 hr, washed three times with the lysis buffer, then eluted by boiling-SDS  
679 lysis, and resolved by 8% SDS-PAGE. The gel was transferred to PVDF membranes, and the  
680 membrane was blocked with 5% milk in TBST buffer for 1 hr at room temperature. It was then  
681 incubated overnight at 4°C with the antibody, washed three times in TBST, and the signals were  
682 revealed by HRP reaction using the SuperSignal Chemiluminescent Substrate (Beyotime,  
683 P0018AS).

684

685 ***Chromatin immunoprecipitation (ChIP) assay***

686 Chromatin immunoprecipitation (ChIP) was prepared using the Upstate Biotechnology and  
687 Abcam kit following the manufacturer's protocol. Briefly, Neuro2A cells were cross-linking at room  
688 temperature by addition of 1% formaldehyde for 15 min. Cross-linking was stopped by addition  
689 of 0.2 M glycine for 5 min at room temperature. Cells were washed three times in 10 ml ice-cold  
690 10 mM PBS (pH 7.4), re-suspended in lysis buffer (50 mM Tris-HCl at pH 8.0, 1% SDS, 5 mM  
691 EDTA, and protease inhibitors) and directly sheared by sonication and processed for ChIP assay.  
692 Lysates was precleared by incubating in 1 mL diluted chromatin with a salmon sperm DNA  
693 /protein A-Sepharose (50  $\mu$ L 50% slurry in 10 mM Tris-HCl, pH 8.0, 1 mM EDTA) for 2 hr at 4 °C  
694 with agitation. Beads were pelleted using brief centrifugation and the supernatant fraction  
695 collected. The rest of the supernatant was divided in two fractions: one for an equivalent amount  
696 of normal rabbit IgG control and the second incubated with ChIP-grade anti-MeCP2 (Abcam,  
697 ab2828) at 4°C with agitation overnight. Salmon sperm DNA/protein A-Sepharose slurry was  
698 added to the immune complexes and incubated at 4°C for 2-4 hr. Sepharose beads were  
699 collected and washed sequentially for 10 min each in the following buffers: once in low salt buffer  
700 (0.1% SDS, 1% Triton X-100, 2 mM EDTA, 20 mM Tris-HCl pH 8.0, 150 mM NaCl), three times  
701 in high salt buffer (0.1% SDS, 1% Triton X-100, 2 mM EDTA, 20 mM Tris-HCl, pH 8.0, 500 mM  
702 NaCl), twice in LiCl buffer (250 mM LiCl, 1% Nonidet P40, 1% deoxycholate, 10 mM Tris-HCl pH  
703 8.0, 1 mM EDTA), and twice in TE buffer (10 mM Tris-HCl pH 8.0, 1 mM EDTA, pH 8.0).  
704 Complexes were eluted using elution buffer (250  $\mu$ l of 1% SDS and 100 mM NaHCO<sub>3</sub>),  
705 formaldehyde cross-links reversed and DNA was precipitated and re-suspended. Both input and  
706 immunoprecipitated samples were analyzed by quantitative RT-PCR with *Bdnf* promotor IV  
707 primers: 5'-GGTCTTTAAGGTGGCCCAAG-3' (forward) and 5'-  
708 TGGAGCATGTGATCAAAACAA-3' (reverse).

709

### 710 ***In utero electroporation***

711 *In utero* electroporation (IUE) of E13.5 pregnant mice (ICR; commercially obtained from

712 SiBeiFu) was performed as previously described<sup>48</sup>. Specifically, pregnant mice were  
713 anesthetized with isoflurane (Yuyanbio, Shanghai). The uterine horns were exposed by  
714 Cesarean section and sterile, pre-warmed saline was repeatedly applied during the operation to  
715 keep the intestines moist. Animals were kept on a heating pad during the entire operation. 1  $\mu$ L  
716 of the DNA plasmids for electroporation (2  $\mu$ g/ $\mu$ L) was injected into the lateral ventricle through  
717 a pulled glass capillary tube. DNA was electroporated into the neocortex. After electroporation,  
718 the uterine horns were carefully repositioned into the abdominal cavity, which was then filled with  
719 pre-warmed saline. Animals were left to recover in a clean cage and embryos allowed to continue  
720 their development. At E17.5 or P15, pregnant mice or young mice were sacrificed. The brains  
721 were dissected and post-fixed with 4% PFA overnight at 4°C. Coronal brain slices from IUE mice  
722 were prepared by Cryostat (Thermo Scientific, FSE) for immunofluorescent staining, or prepared  
723 by the automated vibrating blade microtome (Leica, VT1200 S) for the electrophysiological  
724 recording.

725

### 726 ***Immunofluorescent staining***

727 The immunofluorescent staining of frozen brain sections and cultured neurons was  
728 performed using standard techniques as previously described in our lab<sup>87, 88</sup>. Briefly, frozen  
729 sections (30  $\mu$ m) or cultured neurons were washed for 10 min with 0.5% Triton X-100/PBS  
730 (PBS-T) for three times and then blocked with 5% goat serum in PBST for 1 hr. The sections or  
731 cultured neurons were then incubated overnight at 4°C with primary antibodies, washed for 10  
732 min with 0.5% PBS-T for three times and subsequently treated with Alexa Fluor 568- or Alexa  
733 Fluor 488-conjugated fluorescent secondary antibody (1:500; Biotium, 20103, 20012) 1 hr at  
734 room temperature. The nucleus was counterstained with DAPI (ZSGB-BIO, ZLI-9556) during  
735 mounting onto glass slides with anti-fade solution. All images were processed and analyzed  
736 using Olympus FV-1200 and Image J software.

737

738 ***Electrophysiology***

739 Preparation of brain slices was performed as previously described<sup>89, 90</sup>. A single slice was  
740 then transferred to the recording chamber and submerged in a continuously flowing oxygenated  
741 NaHCO<sub>3</sub>-buffered saline (1.0-1.5 ml/min) warmed at 32°C. The recording electrodes had  
742 resistance of 3-5 MΩ when filled with internal solution consisting of (in mM): 135 mM cesium  
743 methanesulfonate, 10 mM Hepes, 0.2 mM EGTA, 8 mM NaCl, 4 mM Mg-ATP, and 0.3 mM  
744 Na<sub>3</sub>GTP (pH 7.2 with CsOH, osmolality adjusted to 280-290 mOsm). The slice was visualized  
745 with a 40 X water-immersion objective (Olympus) using standard infrared and differential  
746 interference contrast (IR-DIC) microscopy, and a CCD camera (QImaging, Surrey). Cells in the  
747 cortex up to ~60 μm beneath the slice surface were patched and monitored. Recording in normal  
748 voltage-clamp mode was performed with an Axon 700B amplifier (Molecular devices) and  
749 Clampex 10.5 software (Molecular devices). After tight-seal (>1 GΩ) formation, fast and slow  
750 capacitance compensation was auto performed. Neurons were excluded from the analysis when  
751 their series resistance was above 25 MΩ and changed by more than 25% during the experiment.  
752 Data were filtered at 2 kHz and acquired at a sampling rate of 10 kHz. For mEPSC recording,  
753 the target neurons were held at -70 mV in the presence of SR95531 (25 μM; Sigma-Aldrich,  
754 S106) and TTX (1 μM; Kangte Biotech, purity > 99%; 121206). For mIPSC recording, the target  
755 neurons were held at 0 mV in the presence of CNQX (25 μM; Sigma-Aldrich, C239), DL-AP5 (50  
756 μM; Abcam, ab120271), and TTX (1 μM, Kangte Biotech, purity > 99%; 121206). 5 min  
757 consecutive miniature events were collected and analyzed. All mEPSCs or mIPSCs above a  
758 threshold value (5 pA) were included in the data analysis and each event was verified visually.  
759 Experiments were carried out in a genotype-blinded manner. No statistical analysis was used to  
760 predetermine the sample sizes used for experiments; however, our sample sizes are similar to  
761 those reported previously.

762 All drugs were purchased from Sigma-Aldrich (St. Louis, MI, USA) unless otherwise noted.  
763 Drugs were dissolved as concentrated stocks and stored at -20°C. Working solutions with

764 different drugs were prepared just before use. During experiments, drugs were applied in the  
765 flowing bath solutions. Total replacement of the medium in the recording chamber occurred within  
766 1 min. Data analysis was performed with software including Clampfit (Version 10.5), MiniAnalysis  
767 program (Version 6.0.3) Prism (Version 8.0), and Origin (Version 9.0).

768

### 769 ***Dendritic length and spine density analysis***

770 The length of dendritic branches in primary cultured hippocampus neurons was determined  
771 as follows: EGFP-positive neurons were randomly selected from each condition, and the  
772 dendritic length of all protrusions was analyzed using Fiji software. At least three independent  
773 experiments were performed, and the number of neurons > 50 per condition were analyzed. For  
774 spine density analysis, confocal Z stacks of neurons in hippocampal were acquired with a  
775 confocal microscope (Olympus, FV-1200) using an oil-immersion 60 X objective lens. Images  
776 were analyzed with Fiji software. Protrusions in direct contact with the dendrites were counted  
777 as spines, and the average spine density was calculated as the number of spines per  $\mu\text{m}$   
778 dendritic length. At least 500  $\mu\text{m}$  dendrites from seven or more neurons were analyzed for each  
779 groups (more than 3 mice per group). All quantifications were analyzed with One-way analysis  
780 of variance (ANOVA).

781

### 782 ***Statistical analysis***

783 Data are presented as mean  $\pm$  SEM and were analyzed by two-tailed Student's t-test, or one-  
784 way ANOVA followed by Bonferroni test. Kruskal-Wallis ANOVA followed by Dunn's post-hoc test  
785 was performed to analyze the data of electrophysiological experiments. A  $\chi^2$  test was applied to  
786 analyze the distribution of cells in either layers of the neocortex, and the distribution of different  
787 types of dendritic spines. Unless otherwise indicated, in figures, \* $p < 0.05$ , \*\* $p < 0.01$ , and \*\*\* $p <$   
788 0.001. Changes were considered significant if the p value was  $< 0.05$ .

789

790 **SUPPLEMENTAL INFORMATION**

791 Supplemental Information includes three tables and six figures can be found with this article as a  
792 separate supplementary file.

793

794 **AUTHOR CONTRIBUTIONS**

795 H.W. designed the experiments. X.D. performed the MS experiment to identify the O-  
796 GlcNAcylation sites on MeCP2. J.C., L.C., R.D. and Y.W. performed the lentivirus packaging and  
797 purification, biochemical and molecular biology experiments. J.C. and Q.Z. performed the *in utero*  
798 electroporation experiments. Z.Z. and J.C. performed the electrophysiology experiments. H.W.,  
799 X.D., M.F., J.C. and Z.Z. analyzed the results. H.W. and J.C. wrote the manuscript.

800

801 **ACKNOWLEDGMENTS**

802 We thank Dr. Zilong Qiu at Institute of Neuroscience, CAS, Dr. Huadong Pei at the National Center  
803 for Protein Sciences (Beijing), and Dr. Ke-Ping Hu at Chinese Academy of Medical Sciences &  
804 Peking Union Medical College for providing the valuable reagents for this work, and thank Dr.  
805 Dong Yang at Beijing Proteome Research Center for his great help with the phylogeny tree  
806 analysis of MeCP2 protein sequence. We thank all members of the Wu laboratory for discussion.

807 This work was supported by the National Natural Science Foundation of China (Grants 31770929  
808 and 31522029), and the Beijing Municipal Science and Technology Commission (Grants  
809 Z181100001518001 and Z161100000216154) to H.W.

810

811 **CONFLICT OF INTEREST**

812 The authors declare that they have no conflicts of interest with the contents of this article.

813



814 **FIGURE LEGENDS**

815

816 **Figure 1. Identification of O-GlcNAcylation Sites in Rodent and Human MeCP2**

817 (A) The phylogeny tree of MeCP2 protein sequence from 25 representative species. The length  
818 of each branch represents the evolutionary distance between the MeCP2 protein sequences. The  
819 dashed scale line indicates the values of evolutionary distance.

820 (B) MS identified O-GlcNAcylation sites in rodent and human MeCP2 protein. hMeCP2, human  
821 MeCP2; rMeCP2, rat MeCP2; mMeCP2, mice MeCP2; NTD, the N-terminal domain; MBD, the  
822 methyl-CpG binding domain; ID, the intervening domain; TRD, the transcriptional repression  
823 domain; CTD, the C-terminal domain.

824 (C-F) Four representative mass spectra of O-GlcNAcylation sites in hMeCP2 are shown. hMeCP2  
825 was purified from HEK293T cells and analyzed by MS to identify the O-GlcNAcylation sites.

826 (G) Multiple-sequence alignment of MeCP2 protein to reveal the conservation of O-GlcNAcylation  
827 site. The O-GlcNAcylation sites in MeCP2 from eight different representative species are shown.  
828 The identified O-GlcNAcylation sites are shown in red, and T203 site is highlighted in yellow.

829

830 **Figure 2. OGT Directly Interacts with and O-GlcNAcylates MeCP2**

831 (A) The mouse brain lysates were immunoprecipitated with an anti-MeCP2 antibody, followed by  
832 Western blot analysis with an anti-OGT antibody.

833 (B) Reciprocal co-IP assay of mouse brain lysates with an anti-OGT antibody, followed by Western  
834 blot analysis with an anti-MeCP2 antibody.

835 (C-D) GST pull-down assays for His-hMeCP2 and GST-OGT, or His-OGT and GST-hMeCP2.  
836 Input and pull-down samples were analyzed with anti-MeCP2 and anti-OGT antibodies. Input  
837 represents 5% of the amount used for pull-down assay.

838 (E-F) Cell lysates from HEK293T cells transfected with HA-tagged hMeCP2 and GFP-tagged full  
839 length and indicated deletion mutants of OGT were immunoprecipitated with anti-HA or anti-GFP

840 antibodies, followed by Western blot analysis with anti-GFP and anti-HA antibodies, respectively.

841 Input represents 5% of the amount used for pull-down assay.

842 (G-H) Representative quantification of Western blot results followed by co-IP assay in E and F,

843 respectively. Histograms show mean  $\pm$  SEM. One-way ANOVA followed by Bonferroni test, \*\*p <

844 0.01.

845 (I) A summarized diagram for the serial deletion mutants of OGT and their binding capacities to

846 MeCP2 is shown. Deletion of either the entire TPRs or 1-3 TPRs domain within OGT dramatically

847 disrupts its binding to MeCP2.

848

### 849 **Figure 3. T203 Residue of hMeCP2 is Dynamically O-GlcNAcylated by OGT**

850 (A) A schematic depicting the chemoenzymatic labelling approach for biotinylation, capture, and

851 detection of O-GlcNAcylated protein from brain or cell lysates.

852 (B) Detection of O-GlcNAcylated MeCP2 protein in brain lysates from wild type (WT) and *MECP2*

853 transgenic (Tg) mice using chemoenzymatic labelling approach. Higher level of O-GlcNAcylated

854 MeCP2 was detected in *MECP2* Tg mice compared with WT control. In the absence of GalT or

855 UDP-GalNAz, no O-GlcNAcylated MeCP2 can be detected. HSP70 was used as loading control.

856 (C) OGT elevates the O-GlcNAcylation level of MeCP2. Exogenous GFP-tagged hMeCP2 was

857 co-expressed with or without HA-tagged OGT in HEK293T cells for co-IP assay followed by

858 Western blot analysis with anti-MeCP2 and anti-RL2 antibodies, respectively. Input represents 5%

859 of the amount used for co-IP assay. pEGFP-C1 mock vector was used as a negative control.

860 (D) OGT directly O-GlcNAcylates MeCP2 by *in vitro* glycosylation assay. Recombinant His-tagged

861 hMeCP2 protein was incubated with or without purified GST-OGT (323-1041) and UDP-GlcNAc,

862 followed by Western blot analysis with an anti-RL2 antibody. The loading amount of recombinant

863 proteins used for the *in vitro* assay was confirmed by Coomassie blue staining.

864 (E-F) Identification of the O-GlcNAc modified sites in MeCP2 by *in vitro* glycosylation assay.

865 Purified wild type or mutant His-hMeCP2 was used as substrates of GST-OGT (323-1041) in the

866 presence of UDP-GlcNAc. The loading amount of GST-OGT and His-hMeCP2 was confirmed by  
867 Coomassie blue staining. Quantification analysis shows the significantly decreased O-GlcNAc  
868 level in the hMeCP2 mutations including T203M, S204A, T436A and 4Muts. Histograms show  
869 mean  $\pm$  SEM. One-way ANOVA followed by Bonferroni test, \*\*\* $p < 0.001$ .

870 (G-H) Co-IP assay shows dramatically reduced the O-GlcNAc modified level in T203M or 4Muts  
871 of hMeCP2 compared with WT in the presence of OGT in transfected HEK293T cells. Cell lysates  
872 were immunoprecipitated with anti-GFP beads and immunoblotted as indicated in G. Input  
873 represents 5% of the total amount used for co-IP assay. pEGFP-C1 mock vector was used as a  
874 negative control. Quantification analysis shows the significantly decreased RL2 level in T203M  
875 and 4Muts mutants compared with wild type control. Histograms show mean  $\pm$  SEM. One-way  
876 ANOVA followed by Bonferroni test, \*\*\* $p < 0.001$ .

877 (I-J) OGA reversely regulates the O-GlcNAcylation of hMeCP2 by *in vitro* glycosylation assay.  
878 Quantification analysis shows the significantly decreased RL2 level of hMeCP2 in the presence  
879 of GST-OGA. Histograms show mean  $\pm$  SEM. *t*-test, \*\*\* $p < 0.001$ .

880 (K-L) The O-GlcNAcylation of T203M mutant or 4Muts mutant of hMeCP2 was also reversed by  
881 OGA by *in vitro* glycosylation assay. Quantification analysis shows the significantly decreased  
882 RL2 level of WT and hMeCP2 mutants in the presence of GST-OGA. Histograms show mean  $\pm$   
883 SEM. One-way ANOVA followed by Bonferroni test, \*\*\* $p < 0.001$ .

884

885 **Figure 4. T203 O-GlcNAcylation is Required for Dendritic Spine Formation and Soma Size**  
886 **Maintenance in Cultured Hippocampal Neurons**

887 (A) The recombinant lentivirus-mediated protein-replacement assay construct, pLEMPRA-  
888 MeCP2, was generated to knockdown endogenous mMeCP2 and express Flag-tagged ectopic  
889 hMeCP2.

890 (B) Schematic of the experimental design. The primary hippocampal neurons were isolated from  
891 E17.5 mouse embryos for *in vitro* culture. The neurons at DIV 7 were infected with the indicated

892 LEMPRA lentivirus for 7 days, and then fixed at DIV 14 for immunofluorescent staining and  
893 confocal imaging.

894 (C) Representative pictures of mouse primary hippocampal neurons infected with indicated  
895 lentivirus at DIV 7, lentivirus FUGW-GFP was used as negative control. Neurons were collected  
896 and fixed at DIV 14 for immunofluorescent staining with anti-PSD-95 antibody for measurement  
897 of dendritic spines. The soma and dendrites of indicated LEMPRA lentivirus infected positive  
898 neurons were illustrated by GFP (green), and the distribution of PSD-95 positive dendritic spines  
899 were shown in red. Boxed areas of PSD-95 positive puncta (red) along the secondary dendritic  
900 branches are shown at higher magnification to illustrate the detailed dendritic spine density (Zoom  
901 panels). Scale bar represents 10  $\mu\text{m}$  and 5  $\mu\text{m}$ , respectively.

902 (D) Quantification of the area of soma of indicated lentivirus infected positive neurons. Histograms  
903 show mean  $\pm$  SEM. One-way ANOVA followed by Bonferroni test, \*\*p < 0.01.

904 (E-F) Quantification of the linear density and the area of PSD-95 puncta along the secondary  
905 dendritic branches in indicated lentivirus infected positive neurons, respectively. Histograms show  
906 mean  $\pm$  SEM. One-way ANOVA followed by Bonferroni test, \*\*p < 0.01, \*\*\*p < 0.001.

907

### 908 **Figure 5. T203 O-GlcNAcylation is Required for Dendritic Spine Morphogenesis *in vivo***

909 (A) Schematic of the experimental design. The indicated plasmids were *in utero* electroporated in  
910 the neocortex of E13.5 mouse embryos. The electroporated region was then isolated at E17.5 or  
911 P15 for neuronal migration assay or dendritic spine morphogenesis assay, respectively.

912 (B) Distribution of GFP+ pyramidal neurons in the indicated plasmid electroporated neocortex at  
913 E17.5. Boxed areas of GFP+ neurons are shown at higher magnification to illustrate the detailed  
914 distribution within the neocortex. The neocortex was equally divided into three parts from the  
915 inside out showing as the inner layer, the intermediate layer, and the outer layer (Zoom panels).  
916 The representative single GFP+ neuron from indicated groups was traced and illustrated by Fiji  
917 software (Trace panels). Scale bars represents 200  $\mu\text{m}$ , 100  $\mu\text{m}$ , and 25  $\mu\text{m}$ , respectively.

918 (C) Quantification of the relative ratio of GFP+ neuron distribution (%) in distinct neocortical layers.

919 Histograms show mean  $\pm$  SEM.  $\chi^2$ -test, \*\*p < 0.01, \*\*\*p < 0.001.

920 (D) Quantification of the length of leading process (LP) in GFP+ neurons electroporated with the  
921 indicated plasmid. Histograms show mean  $\pm$  SEM. One-way ANOVA followed by Bonferroni test,  
922 \*\*\*p < 0.001.

923 (E) Representative images of dendritic spines on apical or basal dendrites of GFP+ neurons at  
924 P15 after electroporation with the indicated plasmid. Boxed areas of basal and apical dendritic  
925 fragments are shown at higher magnification to illustrate the detailed dendritic spine morphology  
926 (Zoom panels). Scale bar represents 100  $\mu$ m, 50  $\mu$ m, and 3  $\mu$ m, respectively.

927 (F-G) Quantification of the dendritic spine density on apical and basal dendrites in GFP+ neurons,  
928 respectively. Histograms show mean  $\pm$  SEM. One-way ANOVA followed by Bonferroni test, \*p <  
929 0.05, \*\*p < 0.01, \*\*\*p < 0.001.

930 (H) Quantification of the distribution of three subtypes of dendritic spines in GFP+ neurons at P15.  
931 Histograms show mean  $\pm$  SEM.  $\chi^2$ -test, \*p < 0.05, \*\*p < 0.01, \*\*\*p < 0.001.

932

933 **Figure 6. T203 O-GlcNAcylation is Essential for the Excitatory Synaptic Transmission in**  
934 **the Neocortex**

935 (A) Schematic of the experimental design. The indicated plasmids were *in utero* electroporated in  
936 the neocortex of E13.5 mouse embryos. The electroporated region was then isolated at P21, and  
937 coronal brain slices were prepared for Patch clamp recording.

938 (B) A representative GFP+ recording cell electroporated with indicated plasmid showing in A.

939 (C) Representative traces of mEPSC recorded in Layer II/III GFP+ neurons electroporated with  
940 indicated plasmids.

941 (D-E) Quantification of the amplitude and cumulative distributions of mEPSC in recorded GFP+  
942 neurons electroporated with indicated plasmid. Histograms show mean  $\pm$  SEM. Kruskal-Wallis  
943 ANOVA followed by Dunn's post-hoc test, p > 0.05 for all comparisons.

944 (F-G) Quantification of the frequency and cumulative distributions of mEPSC in recorded GFP+  
945 neurons electroporated with indicated plasmid. Histograms show mean  $\pm$  SEM. Kruskal-Wallis  
946 ANOVA followed by Dunn's post-hoc test, \* $p < 0.05$ , \*\* $p < 0.01$ , n.s., not significant.

947 (H) Representative traces of mIPSC recorded in Layer II/III GFP+ neurons electroporated with  
948 indicated plasmid.

949 (I-J) Quantification of the amplitude and cumulative distributions of mIPSC in recorded GFP+  
950 neurons electroporated with indicated plasmid. Histograms show mean  $\pm$  SEM. Kruskal-Wallis  
951 ANOVA followed by Dunn's post-hoc test. No significant differences were detected among each  
952 group,  $p > 0.9999$  for all comparisons.

953 (K-L) Quantification of the frequency and cumulative distributions of mIPSC in recorded GFP+  
954 neurons electroporated with indicated plasmid. Histograms show mean  $\pm$  SEM. Kruskal-Wallis  
955 ANOVA followed by Dunn's post-hoc test. No significant differences were detected among each  
956 group,  $p > 0.9999$  for all comparisons.

957

### 958 **Figure 7. T203 O-GlcNAcylation Activates *Bdnf* Promoter IV-Dependent Transcription**

959 (A) Schematic of the experimental design. The primary cortical neurons were isolated from E15.5  
960 mouse embryos for *in vitro* culture. The neurons at DIV 3 were infected with the indicated lentivirus.  
961 The final concentration of 1  $\mu$ M TTX was added in the culture medium at DIV 7. After 12 hr, the  
962 cultured cortical neurons were treated with 55 mM KCl for 5 hr to trigger synchronous membrane  
963 depolarization. Then the cultured neurons were harvested for RNA extraction and Q-PCR analysis.

964 (B-E) Quantification of the transcription of total *Bdnf*, *Bdnf* exon IV, *Bdnf* exon VI, and *Acta2* at  
965 mRNA level in response to KCl treatment. Histograms show mean  $\pm$  SEM. One-way ANOVA  
966 followed by Bonferroni test, \* $p < 0.05$ , \*\*\* $p < 0.001$ .

967 (F) Schematic of the experimental design. The cultured Neuro2A cells were transfected with the  
968 indicated plasmids for rescue experiments, and 48 hr later, the transfected cells were collected  
969 for ChIP assay.

970 (G) A schematic depicting the total nine exons and exon IV promoter within *Bdnf* locus.  
971 (H) Quantification of the ChIP assay. The binding activity of *Bdnf* exon IV promoter to MeCP2 in  
972 indicated transfected cells were measured by Q-PCR amplification. Histograms show mean  $\pm$   
973 SEM. One-way ANOVA followed by Bonferroni test, \*\* $p < 0.01$ .

974 **REFERENCES**

975

976 1. Laurvick CL, Msall ME, Silburn S, Bower C, Klerk Nd, Leonard H. Physical and Mental Health  
977 of Mothers Caring for a Child With Rett Syndrome. *Pediatrics* 2006, **118**(4): e1152-e1164.

978

979 2. Zoghbi Huda Y. Rett Syndrome and the Ongoing Legacy of Close Clinical Observation. *Cell* 2016,  
980 **167**(2): 293-297.

981

982 3. Amir RE, Van dV, Ignatia B., Wan M, Tran CQ, Francke U, Zoghbi HY. Rett syndrome is caused  
983 by mutations in X-linked MECP2, encoding methyl-CpG-binding protein 2. *Nature Genetics* 1999, **23**(2):  
984 185-188.

985

986 4. Neul JL, Fang P, Barrish J, Lane J, Caeg EB, Smith EO, *et al.* Specific mutations in Methyl-CpG-  
987 Binding Protein 2 confer different severity in Rett syndrome. *Neurology* 2008, **70**(16): 1313-1321.

988

989 5. T. B. MECP2 mutations account for most cases of typical forms of Rett syndrome. *Human*  
990 *Molecular Genetics* 2000, **9**(9): 1377-1384.

991

992 6. Ariani F, Mari F, Pescucci C, Longo I, Bruttini M, Meloni I, *et al.* Real-time quantitative PCR as  
993 a routine method for screening large rearrangements in Rett syndrome: Report of one case of MECP2  
994 deletion and one case of MECP2 duplication. *Human Mutation* 2004, **24**(2): 172-177.

995

996 7. Esch HV, Bauters M, Ignatius J, Jansen M, Froyen G. Duplication of the MECP2 Region Is a  
997 Frequent Cause of Severe Mental Retardation and Progressive Neurological Symptoms in Males.  
998 *American Journal of Human Genetics* 2005, **77**(3): 442-453.

999

1000 8. Meins. Submicroscopic duplication in Xq28 causes increased expression of the MECP2 gene in  
1001 a boy with severe mental retardation and features of Rett syndrome. *Jmedgenet* 2005, **42**(2): e12-e12.

1002

1003 9. Chen RZ, Akbarian S, Tudor M, Jaenisch R. Deficiency of methyl-CpG binding protein-2 in CNS  
1004 neurons results in a Rett-like phenotype in mice. *Nature Genetics* 2001, **27**(3): 327-331.

1005

1006 10. Tate P, Skarnes W, Bird A. The methyl-CpG binding protein MeCP2 is essential for embryonic  
1007 development in the mouse. *Nature Genetics* 1996, **12**(2): 205-208.

1008

1009 11. Marchetto MC, Carromeu C, Acab A, Yu D, Yeo GW, Mu Y, *et al.* A model for neural development  
1010 and treatment of Rett syndrome using human induced pluripotent stem cells. *Cell* 2010, **143**(4): 527-539.

1011

1012 12. Li Y, Wang H, Muffat J, Cheng AW, Orlando DA, Lovén J, *et al.* Global Transcriptional and



1013 Translational Repression in Human-Embryonic-Stem-Cell-Derived Rett Syndrome Neurons. *Cell Stem*  
1014 *Cell* 2013, **13**(4): 446-458.

1015  
1016 13. Chapleau CA, Calfa GD, Lane MC, Albertson AJ, Larimore JL, Kudo S, *et al.* Dendritic spine  
1017 pathologies in hippocampal pyramidal neurons from Rett syndrome brain and after expression of Rett-  
1018 associated MECP2 mutations. *Neurobiology of Disease* 2009, **35**(2): 219-233.

1019  
1020 14. Schüle B, Armstrong DD, Vogel H, Oviedo A, Francke U. Severe congenital encephalopathy  
1021 caused by MECP2 null mutations in males: central hypoxia and reduced neuronal dendritic structure.  
1022 *Clinical Genetics* 2008, **74**.

1023  
1024 15. Kishi N, Macklis JD. MECP2 is progressively expressed in post-migratory neurons and is  
1025 involved in neuronal maturation rather than cell fate decisions. *Molecular & Cellular Neuroscience* 2004,  
1026 **27**(3): 306-321.

1027  
1028 16. Guy J, Gan J, Selfridge J, Cobb S, Bird A. Reversal of Neurological Defects in a Mouse Model  
1029 of Rett Syndrome. *Science* 2007, **315**(5815): 1143-1147.

1030  
1031 17. P. M. Learning and Memory and Synaptic Plasticity Are Impaired in a Mouse Model of Rett  
1032 Syndrome. *Journal of Neuroscience* 2006, **26**(1): 319-327.

1033  
1034 18. Na ES, Nelson ED, Kavalali ET, Monteggia LM. The impact of MeCP2 loss- or gain-of-function  
1035 on synaptic plasticity. *Neuropsychopharmacology* 2013, **38**(1): 212-219.

1036  
1037 19. Collins AL, Levenson JM, Vilaythong AP, Richman R, Armstrong DL, Noebels JL, *et al.* Mild  
1038 overexpression of MeCP2 causes a progressive neurological disorder in mice. *Hum Mol Genet* 2004,  
1039 **13**(21): 2679-2689.

1040  
1041 20. Liu Z, Li X, Zhang J-T, Cai Y-J, Cheng T-L, Cheng C, *et al.* Autism-like behaviours and germline  
1042 transmission in transgenic monkeys overexpressing MeCP2. *Nature* 2016, **530**(7588): 98.

1043  
1044 21. Chen WG, Chang Q, Lin Y, Meissner A, West AE, Griffith EC, *et al.* Derepression of BDNF  
1045 transcription involves calcium-dependent phosphorylation of MeCP2. *Science* 2003, **302**(5646): 885-889.

1046  
1047 22. Martinowich K, Hattori D, Wu H, Fouse S, He F, Hu Y, *et al.* DNA methylation-related chromatin  
1048 remodeling in activity-dependent BDNF gene regulation. *Science* 2003, **302**(5646): 890-893.

1049  
1050 23. Tao J, Hu K, Chang Q, Wu H, Sherman NE, Martinowich K, *et al.* Phosphorylation of MeCP2 at  
1051 Serine 80 regulates its chromatin association and neurological function. *Proceedings of the National*

1052 *Academy of Sciences* 2009, **106**(12): 4882-4887.

1053

1054 24. Zhou Z, Hong EJ, Cohen S, Zhao W-n, Ho H-yH, Schmidt L, *et al.* Brain-specific phosphorylation  
1055 of MeCP2 regulates activity-dependent Bdnf transcription, dendritic growth, and spine maturation. *Neuron*  
1056 2006, **52**(2): 255-269.

1057

1058 25. Rutlin M, Nelson SB. MeCP2: phosphorylated locally, acting globally. *Neuron* 2011, **72**(1): 3-5.

1059

1060 26. Olivier-Van Stichelen S, Wang P, Comly M, Love DC, Hanover JA. Nutrient-driven O-linked N-  
1061 acetylglucosamine (O-GlcNAc) cycling impacts neurodevelopmental timing and metabolism. *J Biol Chem*  
1062 2017, **292**(15): 6076-6085.

1063

1064 27. Lagerlof O, Hart GW, Huganir RL. O-GlcNAc transferase regulates excitatory synapse maturity.  
1065 *Proc Natl Acad Sci U S A* 2017, **114**(7): 1684-1689.

1066

1067 28. Hwang H, Rhim H. Acutely elevated O-GlcNAcylation suppresses hippocampal activity by  
1068 modulating both intrinsic and synaptic excitability factors. *Sci Rep* 2019, **9**(1): 7287.

1069

1070 29. Hart GW. Three Decades of Research on O-GlcNAcylation - A Major Nutrient Sensor That  
1071 Regulates Signaling, Transcription and Cellular Metabolism. *Front Endocrinol (Lausanne)* 2014, **5**: 183.

1072

1073 30. Bond MR, Hanover JA. A little sugar goes a long way: the cell biology of O-GlcNAc. *J Cell Biol*  
1074 2015, **208**(7): 869-880.

1075

1076 31. Hart GW, Housley MP, Slawson C. Cycling of O-linked  $\beta$ -N-acetylglucosamine on  
1077 nucleocytoplasmic proteins. *Nature* 2007, **446**(7139): 1017-1022.

1078

1079 32. Rexach JE, Clark PM, Hsieh-Wilson LC. Chemical approaches to understanding O-GlcNAc  
1080 glycosylation in the brain. *Nature Chemical Biology* 2008, **4**(2): 97-106.

1081

1082 33. Parween S, Varghese DS, Ardah MT, Prabakaran AD, Mensah-Brown E, Emerald BS, *et al.*  
1083 Higher O-GlcNAc Levels Are Associated with Defects in Progenitor Proliferation and Premature Neuronal  
1084 Differentiation during in-Vitro Human Embryonic Cortical Neurogenesis. *Front Cell Neurosci* 2017, **11**:  
1085 415.

1086

1087 34. Wheatley EG, Albarran E, White CW, 3rd, Bieri G, Sanchez-Diaz C, Pratt K, *et al.* Neuronal O-  
1088 GlcNAcylation Improves Cognitive Function in the Aged Mouse Brain. *Curr Biol* 2019, **29**(20): 3359-  
1089 3369 e3354.

1090

- 1091 35. Wang Z, Udeshi ND, O'Malley M, Shabanowitz J, Hunt DF, Hart GW. Enrichment and site  
1092 mapping of O-linked N-acetylglucosamine by a combination of chemical/enzymatic tagging,  
1093 photochemical cleavage, and electron transfer dissociation mass spectrometry. *Mol Cell Proteomics* 2010,  
1094 **9**(1): 153-160.  
1095
- 1096 36. Rexach JE, Rogers CJ, Yu S-H, Tao J, Sun YE, Hsieh-Wilson LC. Quantification of O-  
1097 glycosylation stoichiometry and dynamics using resolvable mass tags. *Nature Chemical Biology* 2010,  
1098 **6**(9): 645-651.  
1099
- 1100 37. Krishnaraj R, Ho G, Christodoulou J. RettBASE: Rett Syndrome Database Update. *Human*  
1101 *Mutation* 2017, **00**: 1-10.  
1102
- 1103 38. Bellini E, Pavesi G, Barbiero I, Bergo A, Chandola C, Nawaz MS, *et al.* MeCP2 post-translational  
1104 modifications: a mechanism to control its involvement in synaptic plasticity and homeostasis? *Front Cell*  
1105 *Neurosci* 2014, **8**: 236.  
1106
- 1107 39. Kharrat M, Triki C, Maalej M, Ncir S, Ammar M, Kammoun F, *et al.* First description of an  
1108 unusual novel double mutation in MECP2 co-occurring with the m.827A>G mutation in the MT-RNR1  
1109 gene associated with angelman-like syndrome. *Int J Dev Neurosci* 2019, **79**: 37-44.  
1110
- 1111 40. Lombardi LM, Baker SA, Zoghbi HY. MECP2 disorders: from the clinic to mice and back. *The*  
1112 *Journal of clinical investigation* 2015, **125**(8): 2914-2923.  
1113
- 1114 41. Thompson JW, Griffin ME, Hsieh-Wilson LC. Methods for the detection, study, and dynamic  
1115 profiling of O-GlcNAc glycosylation. *Methods in enzymology*, vol. 598. Elsevier, 2018, pp 101-135.  
1116
- 1117 42. Peng C, Zhu Y, Zhang W, Liao Q, Chen Y, Zhao X, *et al.* Regulation of the Hippo-YAP pathway  
1118 by glucose sensor O-GlcNAcylation. *Molecular cell* 2017, **68**(3): 591-604. e595.  
1119
- 1120 43. Cheng TL, Wang Z, Liao Q, Zhu Y, Zhou WH, Xu W, *et al.* MeCP2 suppresses nuclear microRNA  
1121 processing and dendritic growth by regulating the DGCR8/Drosha complex. *Dev Cell* 2014, **28**(5): 547-  
1122 560.  
1123
- 1124 44. Ramocki MB, Peters SU, Tavyev YJ, Zhang F, Carvalho CMB, Schaaf CP, *et al.* Autism and other  
1125 neuropsychiatric symptoms are prevalent in individuals with MeCP2 duplication syndrome. *Annals of*  
1126 *Neurology* 2009, **66**(6): 771-782.  
1127
- 1128 45. Jiang M, Ash RT, Baker SA, Suter B, Ferguson A, Park J, *et al.* Dendritic arborization and spine  
1129 dynamics are abnormal in the mouse model of MECP2 duplication syndrome. *J Neurosci* 2013, **33**(50):

1130 19518-19533.

1131

1132 46. Wood L, Gray NW, Zhou Z, Greenberg ME, Shepherd GM. Synaptic circuit abnormalities of  
1133 motor-frontal layer 2/3 pyramidal neurons in an RNA interference model of methyl-CpG-binding protein  
1134 2 deficiency. *J Neurosci* 2009, **29**(40): 12440-12448.

1135

1136 47. Chao HT, Zoghbi HY, Rosenmund C. MeCP2 controls excitatory synaptic strength by regulating  
1137 glutamatergic synapse number. *Neuron* 2007, **56**(1): 58-65.

1138

1139 48. Navarro-Quiroga I, Chittajallu R, Gallo V, Haydar TF. Long-term, selective gene expression in  
1140 developing and adult hippocampal pyramidal neurons using focal in utero electroporation. *J Neurosci* 2007,  
1141 **27**(19): 5007-5011.

1142

1143 49. Yanagida M, Miyoshi R, Toyokuni R, Zhu Y, Murakami F. Dynamics of the leading process,  
1144 nucleus, and Golgi apparatus of migrating cortical interneurons in living mouse embryos. *Proc Natl Acad  
1145 Sci U S A* 2012, **109**(41): 16737-16742.

1146

1147 50. Belichenko PV, Oldfors A, Hagberg B, Dahlstrom A. Rett syndrome: 3-D confocal microscopy of  
1148 cortical pyramidal dendrites and afferents. *Neuroreport* 1994, **5**(12): 1509-1513.

1149

1150 51. Sala C, Segal M. Dendritic spines: the locus of structural and functional plasticity. *Physiol Rev*  
1151 2014, **94**(1): 141-188.

1152

1153 52. Peters A, Kaiserman-Abramof IR. The small pyramidal neuron of the rat cerebral cortex. The  
1154 synapses upon dendritic spines. *Z Zellforsch Mikrosk Anat* 1969, **100**(4): 487-506.

1155

1156 53. Neul JL, Zoghbi HY. Rett syndrome: a prototypical neurodevelopmental disorder. *Neuroscientist*  
1157 2004, **10**(2): 118-128.

1158

1159 54. Blackman MP, Djukic B, Nelson SB, Turrigiano GG. A critical and cell-autonomous role for  
1160 MeCP2 in synaptic scaling up. *J Neurosci* 2012, **32**(39): 13529-13536.

1161

1162 55. Qiu Z, Sylwestrak EL, Lieberman DN, Zhang Y, Liu XY, Ghosh A. The Rett syndrome protein  
1163 MeCP2 regulates synaptic scaling. *J Neurosci* 2012, **32**(3): 989-994.

1164

1165 56. Dani VS, Nelson SB. Intact long-term potentiation but reduced connectivity between neocortical  
1166 layer 5 pyramidal neurons in a mouse model of Rett syndrome. *J Neurosci* 2009, **29**(36): 11263-11270.

1167

1168 57. Lonetti G, Angelucci A, Morando L, Boggio EM, Giustetto M, Pizzorusso T. Early environmental

1169 enrichment moderates the behavioral and synaptic phenotype of MeCP2 null mice. *Biol Psychiatry* 2010,  
1170 **67**(7): 657-665.

1171  
1172 58. Poo MM. Neurotrophins as synaptic modulators. *Nat Rev Neurosci* 2001, **2**(1): 24-32.

1173  
1174 59. Tanaka J, Horiike Y, Matsuzaki M, Miyazaki T, Ellis-Davies GC, Kasai H. Protein synthesis and  
1175 neurotrophin-dependent structural plasticity of single dendritic spines. *Science* 2008, **319**(5870): 1683-  
1176 1687.

1177  
1178 60. Figurov A, Pozzo-Miller LD, Olafsson P, Wang T, Lu B. Regulation of synaptic responses to high-  
1179 frequency stimulation and LTP by neurotrophins in the hippocampus. *Nature* 1996, **381**(6584): 706-709.

1180  
1181 61. Luine V, Frankfurt M. Interactions between estradiol, BDNF and dendritic spines in promoting  
1182 memory. *Neuroscience* 2013, **239**: 34-45.

1183  
1184 62. Shieh PB, Hu SC, Bobb K, Timmusk T, Ghosh A. Identification of a signaling pathway involved  
1185 in calcium regulation of BDNF expression. *Neuron* 1998, **20**(4): 727-740.

1186  
1187 63. Tao X, West AE, Chen WG, Corfas G, Greenberg ME. A calcium-responsive transcription factor,  
1188 CaRF, that regulates neuronal activity-dependent expression of BDNF. *Neuron* 2002, **33**(3): 383-395.

1189  
1190 64. Tai DJC, Liu YC, Hsu WL, Ma YL, Cheng SJ, Liu SY, *et al.* MeCP2 SUMOylation rescues  
1191 Mecp2-mutant-induced behavioural deficits in a mouse model of Rett syndrome. *Nature Communications*  
1192 2016, **7**(1): 10552.

1193  
1194 65. Cohen S, Gabel Harrison W, Hemberg M, Hutchinson Ashley N, Sadacca LA, Ebert Daniel H, *et*  
1195 *al.* Genome-Wide Activity-Dependent MeCP2 Phosphorylation Regulates Nervous System Development  
1196 and Function. *Neuron* 2011, **72**(1): 72-85.

1197  
1198 66. Ebert DH, Gabel HW, Robinson ND, Kastan NR, Hu LS, Cohen S, *et al.* Activity-dependent  
1199 phosphorylation of MeCP2 threonine 308 regulates interaction with NCoR. *Nature* 2013, **499**(7458): 341-  
1200 345.

1201  
1202 67. Pandey S, Simmons GE, Jr., Malyarchuk S, Calhoun TN, Pruitt K. A novel MeCP2 acetylation  
1203 site regulates interaction with ATRX and HDAC1. *Genes & cancer* 2015, **6**(9-10): 408-421.

1204  
1205 68. Choudhary C, Kumar C, Gnad F, Nielsen ML, Rehman M, Walther TC, *et al.* Lysine acetylation  
1206 targets protein complexes and co-regulates major cellular functions. *Science* 2009, **325**(5942): 834-840.

1207

- 1208 69.Lefebvre T, Guinez C, Dehennaut V, Beseme-Dekeyser O, Morelle W, Michalski J-C. Does O-  
1209 GlcNAc play a role in neurodegenerative diseases? *Expert Review of Proteomics* 2005, **2(2)**: 265-275.  
1210
- 1211 70.Lefebvre T, Caillet-Boudin ML, Buee L, Delacourte A, Michalski JC. O-GlcNAc glycosylation  
1212 and neurological disorders. *Advances in Experimental Medicine and Biology* 2003, **535**: 189-202.  
1213
- 1214 71.Liu F, Iqbal K, Grundke-Iqbal I, Hart GW, Gong CX. O-GlcNAcylation regulates phosphorylation  
1215 of tau: a mechanism involved in Alzheimer's disease. *Proc Natl Acad Sci U S A* 2004, **101(29)**: 10804-  
1216 10809.  
1217
- 1218 72.Lagerlöf O, Hart GW, Haganir RL. O-GlcNAc transferase regulates excitatory synapse maturity.  
1219 *Proceedings of the National Academy of Sciences* 2017, **114(7)**: 1684-1689.  
1220
- 1221 73.Bedogni F, Rossi RL, Galli F, Cobolli Gigli C, Gandaglia A, Kilstrup-Nielsen C, *et al.* Rett  
1222 syndrome and the urge of novel approaches to study MeCP2 functions and mechanisms of action. *Neurosci*  
1223 *Biobehav Rev* 2014, **46 Pt 2**: 187-201.  
1224
- 1225 74.Khidekel N, Ficarro SB, Peters EC, Hsieh-Wilson LC. Exploring the O-GlcNAc proteome: direct  
1226 identification of O-GlcNAc-modified proteins from the brain. *Proc Natl Acad Sci U S A* 2004, **101(36)**:  
1227 13132-13137.  
1228
- 1229 75.Tallent MK, Varghis N, Skorobogatko Y, Hernandez-Cuebas L, Whelan K, Vocadlo DJ, *et al.* In  
1230 vivo modulation of O-GlcNAc levels regulates hippocampal synaptic plasticity through interplay with  
1231 phosphorylation. *J Biol Chem* 2009, **284(1)**: 174-181.  
1232
- 1233 76.Rexach JE, Clark PM, Mason DE, Neve RL, Peters EC, Hsieh-Wilson LC. Dynamic O-GlcNAc  
1234 modification regulates CREB-mediated gene expression and memory formation. *Nat Chem Biol* 2012,  
1235 **8(3)**: 253-261.  
1236
- 1237 77.Griffith LS, Mathes M, Schmitz B.  $\beta$ -Amyloid precursor protein is modified with O-linked N-  
1238 acetylglucosamine. *Journal of neuroscience research* 1995, **41(2)**: 370-278.  
1239
- 1240 78.Khidekel N, Ficarro SB, Clark PM, Bryan MC, Swaney DL, Rexach JE, *et al.* Probing the  
1241 dynamics of O-GlcNAc glycosylation in the brain using quantitative proteomics. *Nature Chemical Biology*  
1242 2007, **3(6)**: 339-348.  
1243
- 1244 79.Lamarre-Vincent N, Hsieh-Wilson LC. Dynamic Glycosylation of the Transcription Factor CREB:  
1245 A Potential Role in Gene Regulation. *Journal of the American Chemical Society* 2003, **125(22)**: 6612-  
1246 6613.

- 1247  
1248 80. Chahrour M, Jung SY, Shaw C, Zhou X, Wong ST, Qin J, *et al.* MeCP2, a key contributor to  
1249 neurological disease, activates and represses transcription. *Science* 2008, **320**(5880): 1224-1229.  
1250
- 1251 81. Bu Q, Wang A, Hamzah H, Waldman A, Jiang K, Dong Q, *et al.* CREB Signaling Is Involved in  
1252 Rett Syndrome Pathogenesis. *J Neurosci* 2017, **37**(13): 3671-3685.  
1253
- 1254 82. Hart GW, Slawson C, Ramirez-Correa G, Lagerlof O. Cross talk between O-GlcNAcylation and  
1255 phosphorylation: roles in signaling, transcription, and chronic disease. *Annu Rev Biochem* 2011, **80**: 825-  
1256 858.  
1257
- 1258 83. Hu P, Shimoji S, Hart GW. Site-specific interplay between O-GlcNAcylation and phosphorylation  
1259 in cellular regulation. *FEBS Lett* 2010, **584**(12): 2526-2538.  
1260
- 1261 84. Shah RR, Bird AP. MeCP2 mutations: progress towards understanding and treating Rett syndrome.  
1262 *Genome Med* 2017, **9**(1): 17.  
1263
- 1264 85. Lois C, Hong EJ, Pease S, Brown EJ, Baltimore D. Germline Transmission and Tissue-Specific  
1265 Expression of Transgenes Delivered by Lentiviral Vectors. *Science* 2002, **295**(5556): 868-872.  
1266
- 1267 86. Rao X, Duan X, Mao W, Li X, Li Z, Li Q, *et al.* O-GlcNAcylation of G6PD promotes the pentose  
1268 phosphate pathway and tumor growth. *Nat Commun* 2015, **6**: 8468.  
1269
- 1270 87. Wu H, Barik A, Lu Y, Shen C, Bowman A, Li L, *et al.* Slit2 as a beta-catenin/Ctnnb1-dependent  
1271 retrograde signal for presynaptic differentiation. *Elife* 2015, **4**.  
1272
- 1273 88. Yang H, Zhu Q, Cheng J, Wu Y, Fan M, Zhang J, *et al.* Opposite regulation of Wnt/beta-catenin  
1274 and Shh signaling pathways by Rack1 controls mammalian cerebellar development. *Proc Natl Acad Sci*  
1275 *USA* 2019, **116**(10): 4661-4670.  
1276
- 1277 89. Yang H, Yang C, Zhu Q, Wei M, Li Y, Cheng J, *et al.* Rack1 Controls Parallel Fiber-Purkinje Cell  
1278 Synaptogenesis and Synaptic Transmission. *Front Cell Neurosci* 2019, **13**: 539.  
1279
- 1280 90. Zhao Z, Zhang K, Liu X, Yan H, Ma X, Zhang S, *et al.* Involvement of HCN Channel in  
1281 Muscarinic Inhibitory Action on Tonic Firing of Dorsolateral Striatal Cholinergic Interneurons. *Front Cell*  
1282 *Neurosci* 2016, **10**: 71.  
1283  
1284

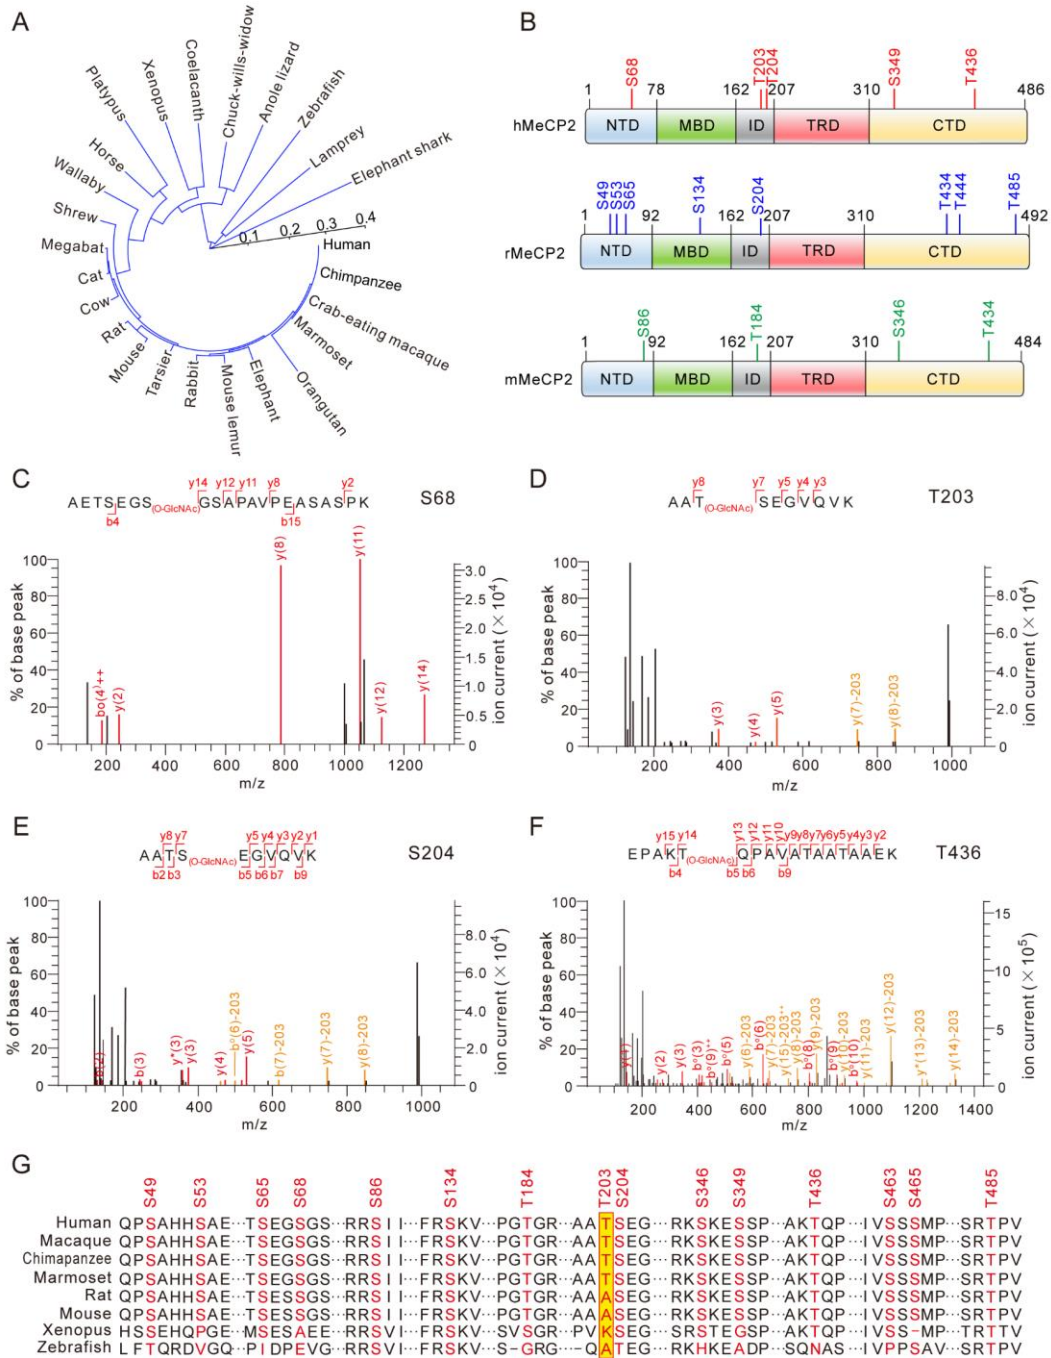

**Figure 1. Identification of O-GlcNAcylation Sites in Rodent and Human MeCP2**



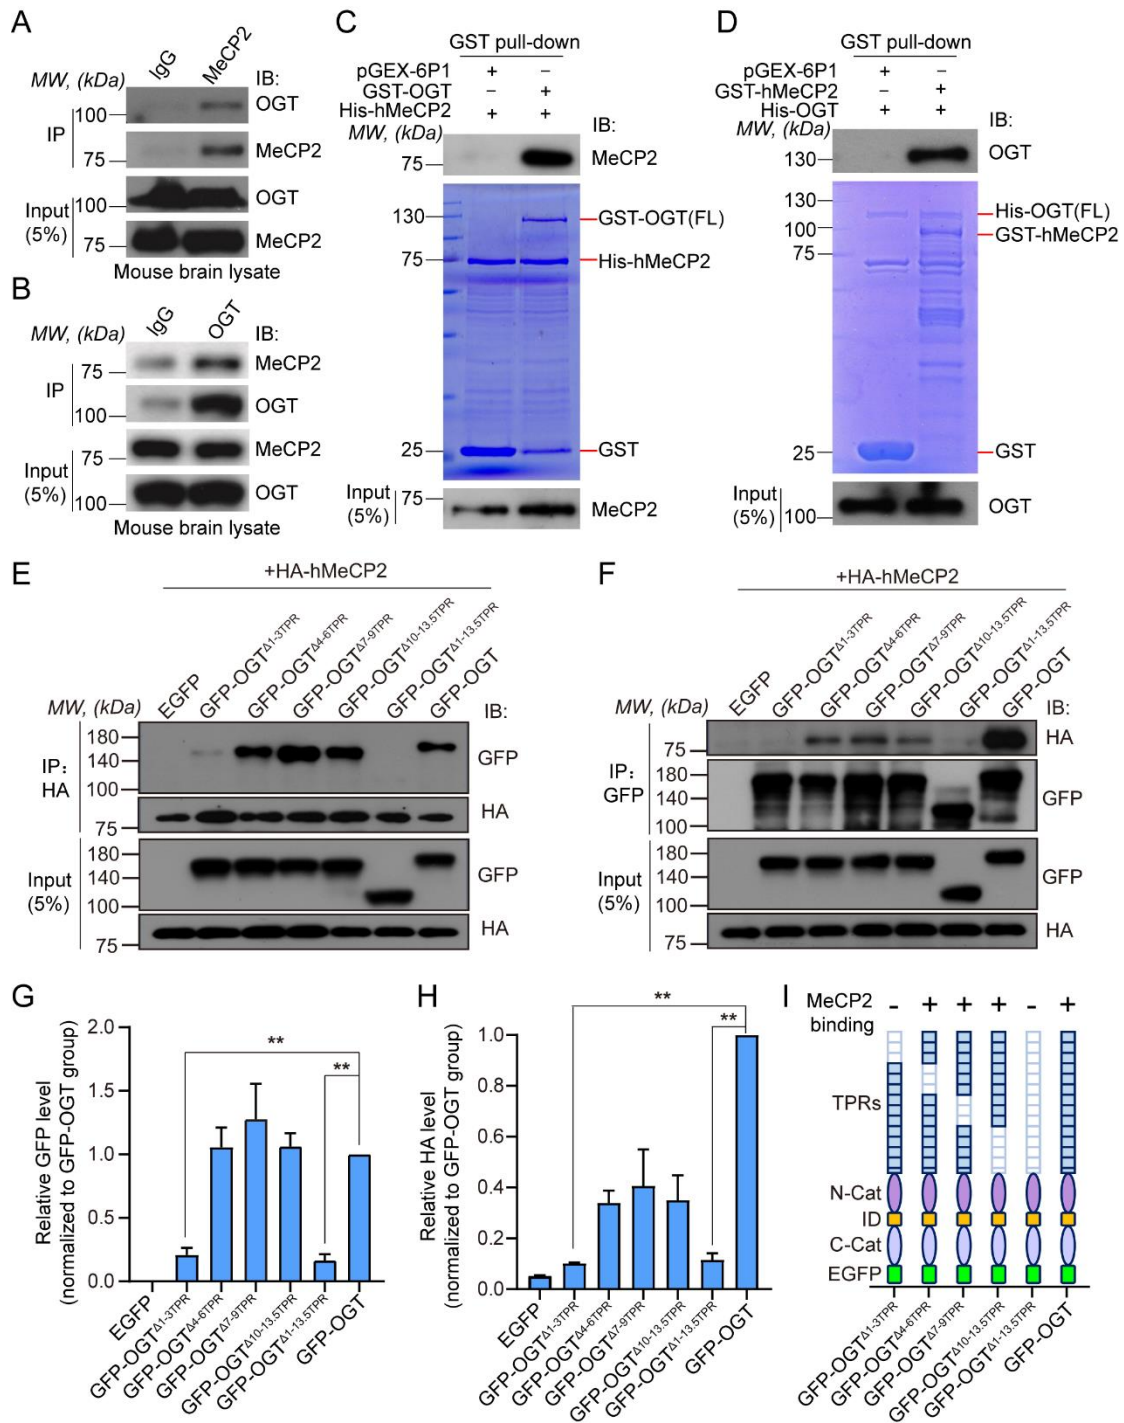

**Figure 2. OGT Directly Interacts with and O-GlcNAcylates MeCP2**

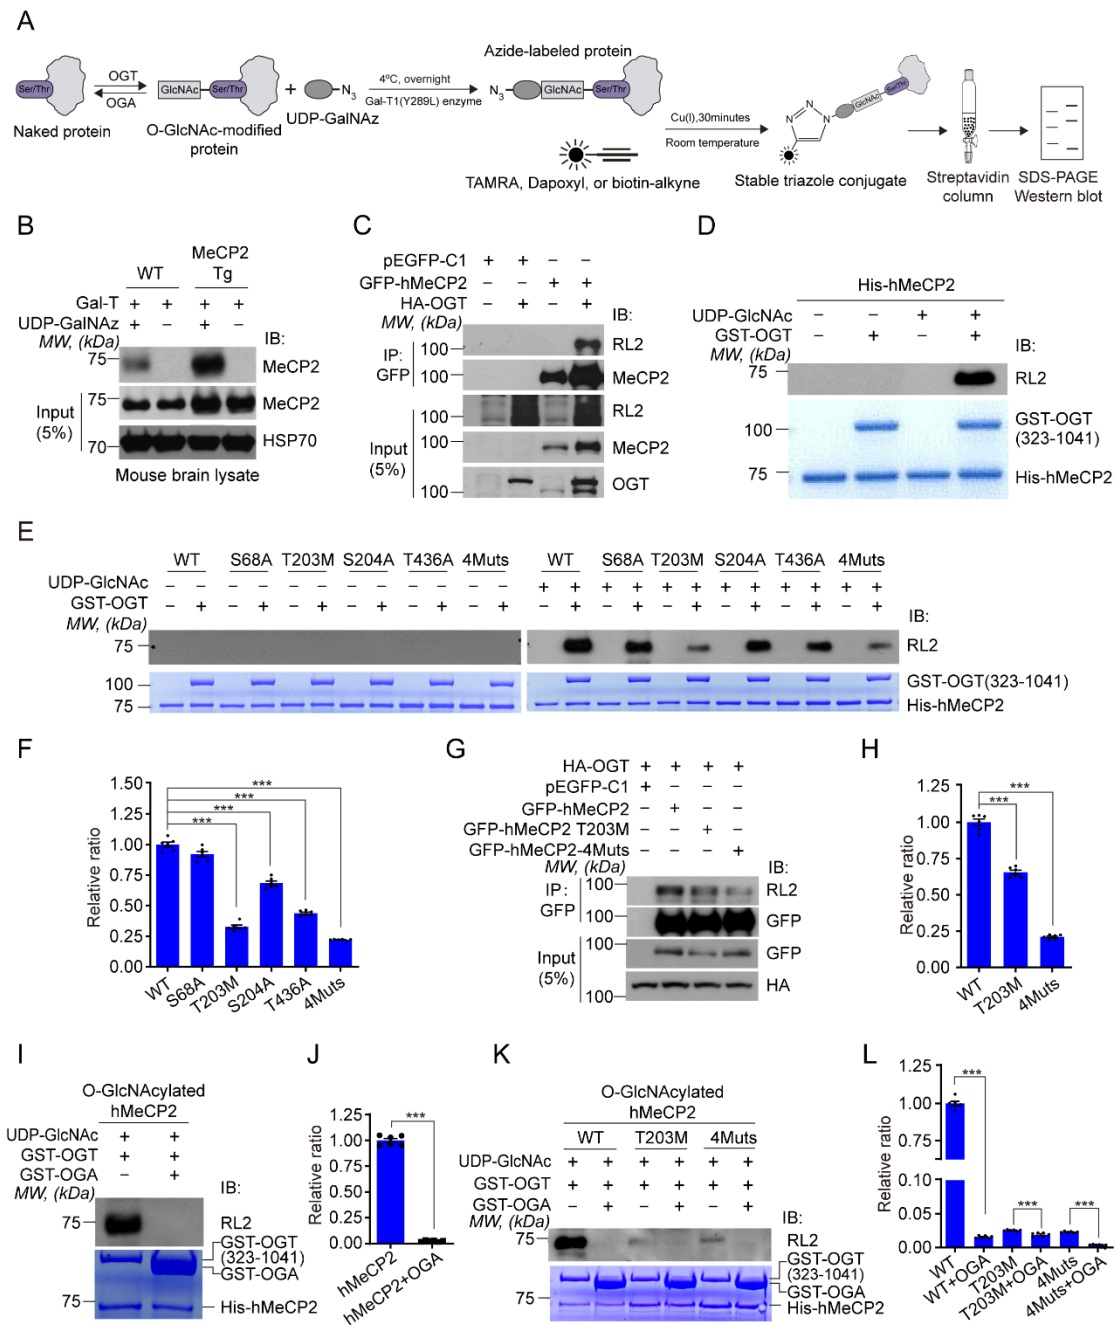

**Figure 3. T203 Residue of hMeCP2 is Dynamically O-GlcNAcyated by OGT**

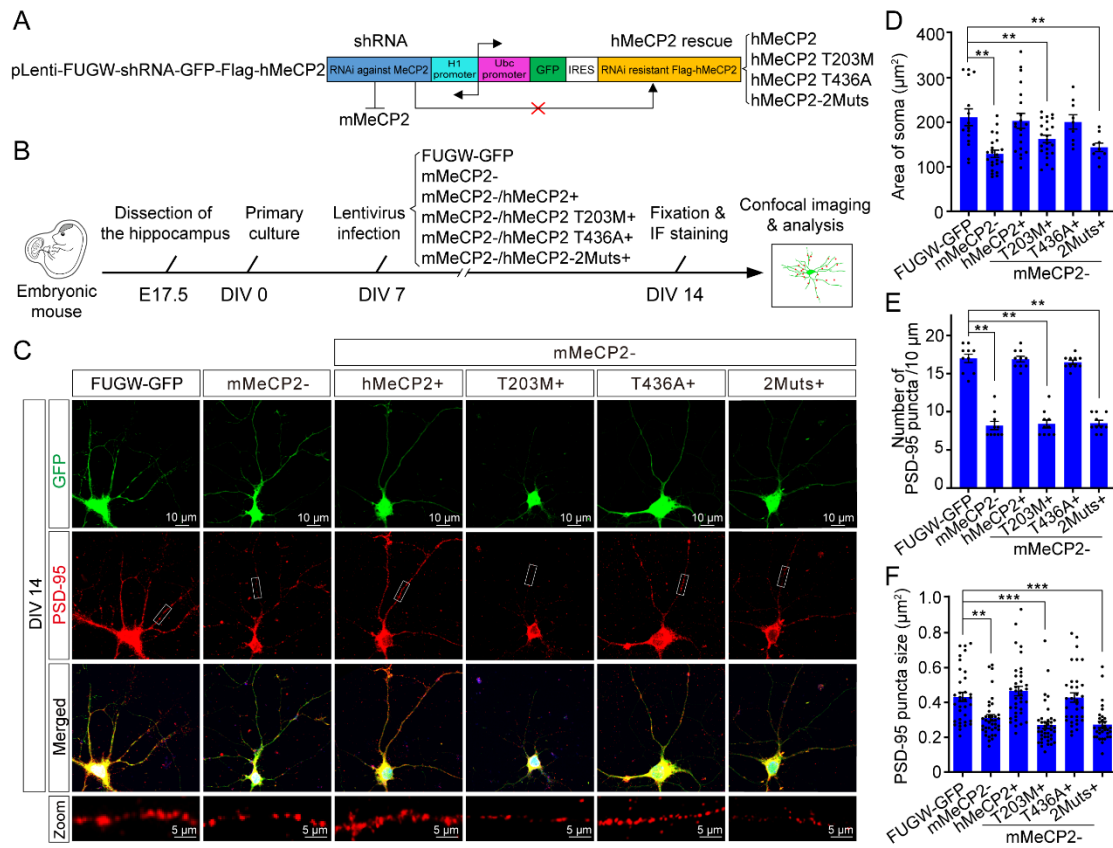

**Figure 4. T203 O-GlcNAcylation is Required for Dendritic Spine Formation and Soma Size Maintenance in Cultured Hippocampal Neurons**

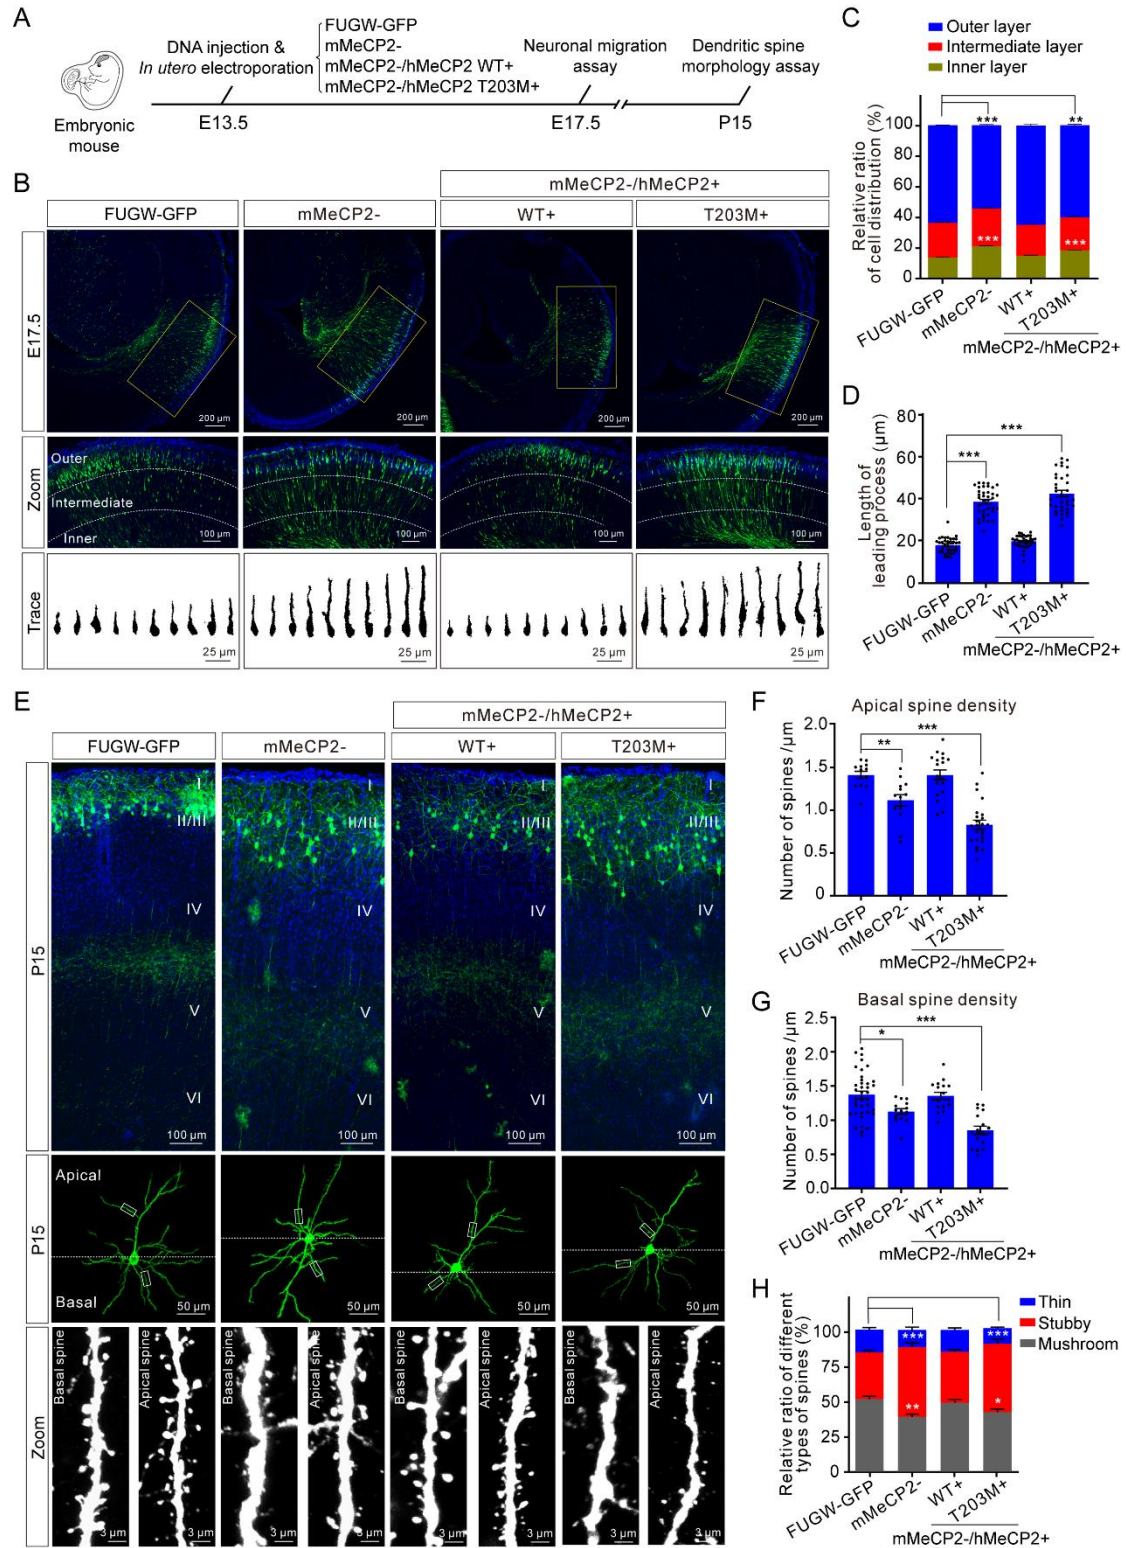

**Figure 5. T203 O-GlcNAcylation is Required for Dendritic Spine Morphogenesis *in vivo***

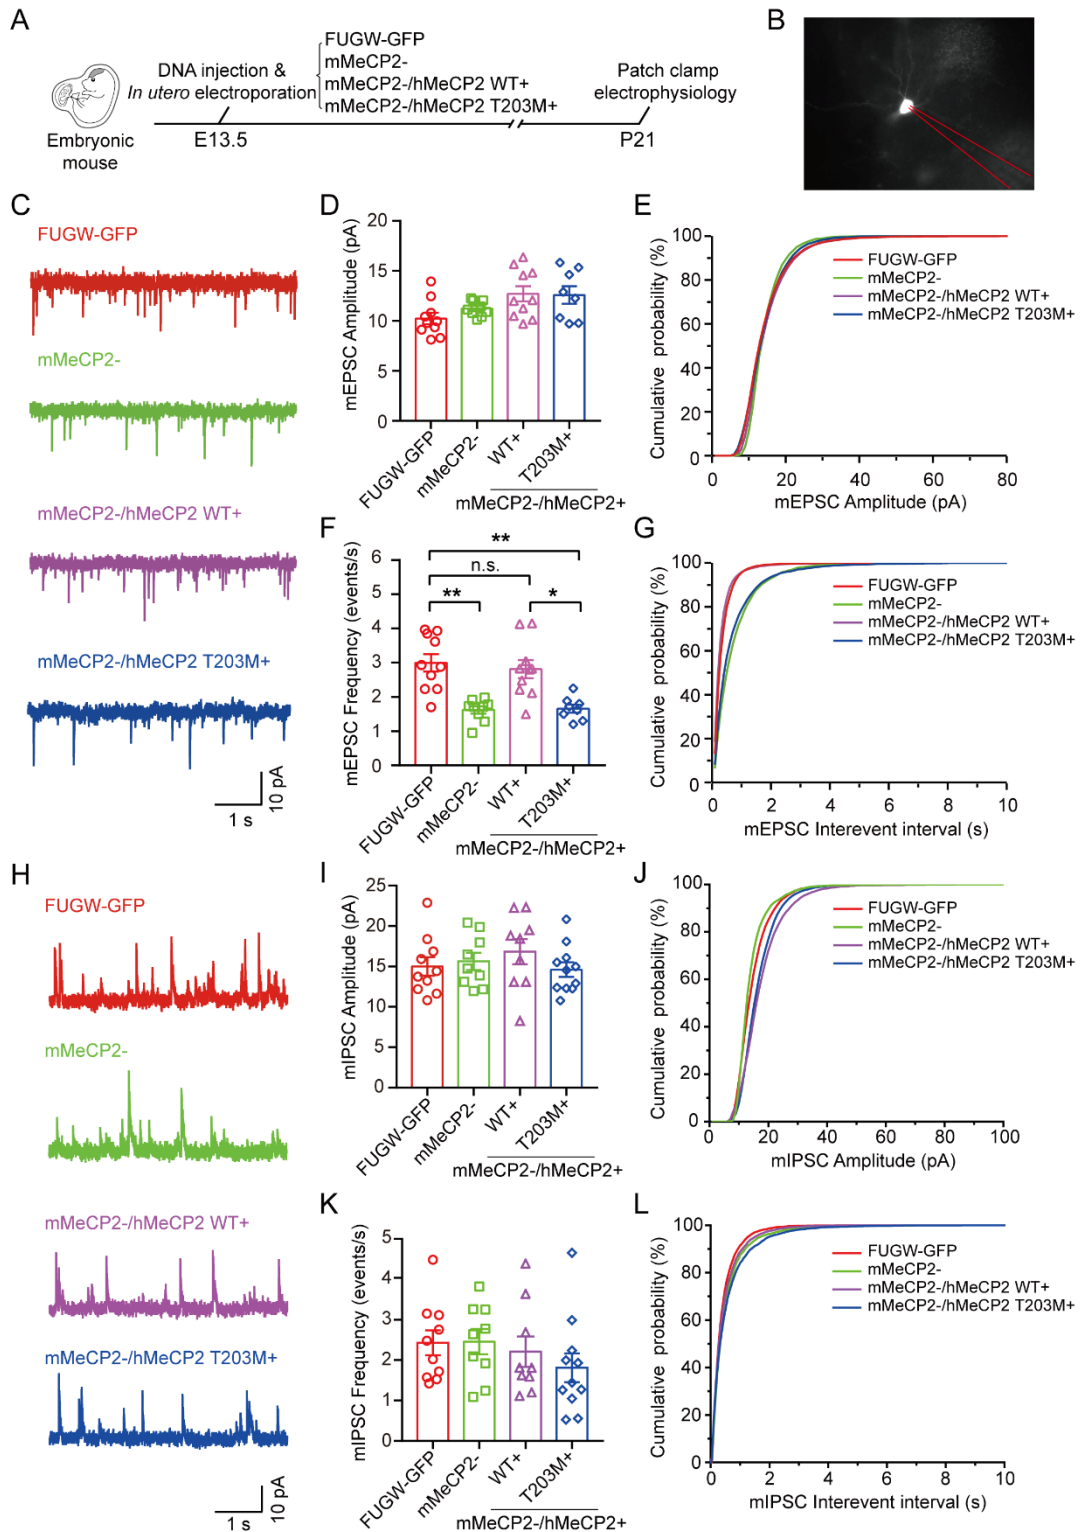

**Figure 6. T203 O-GlcNAcylation is Essential for the Excitatory Synaptic Transmission in the Neocortex**

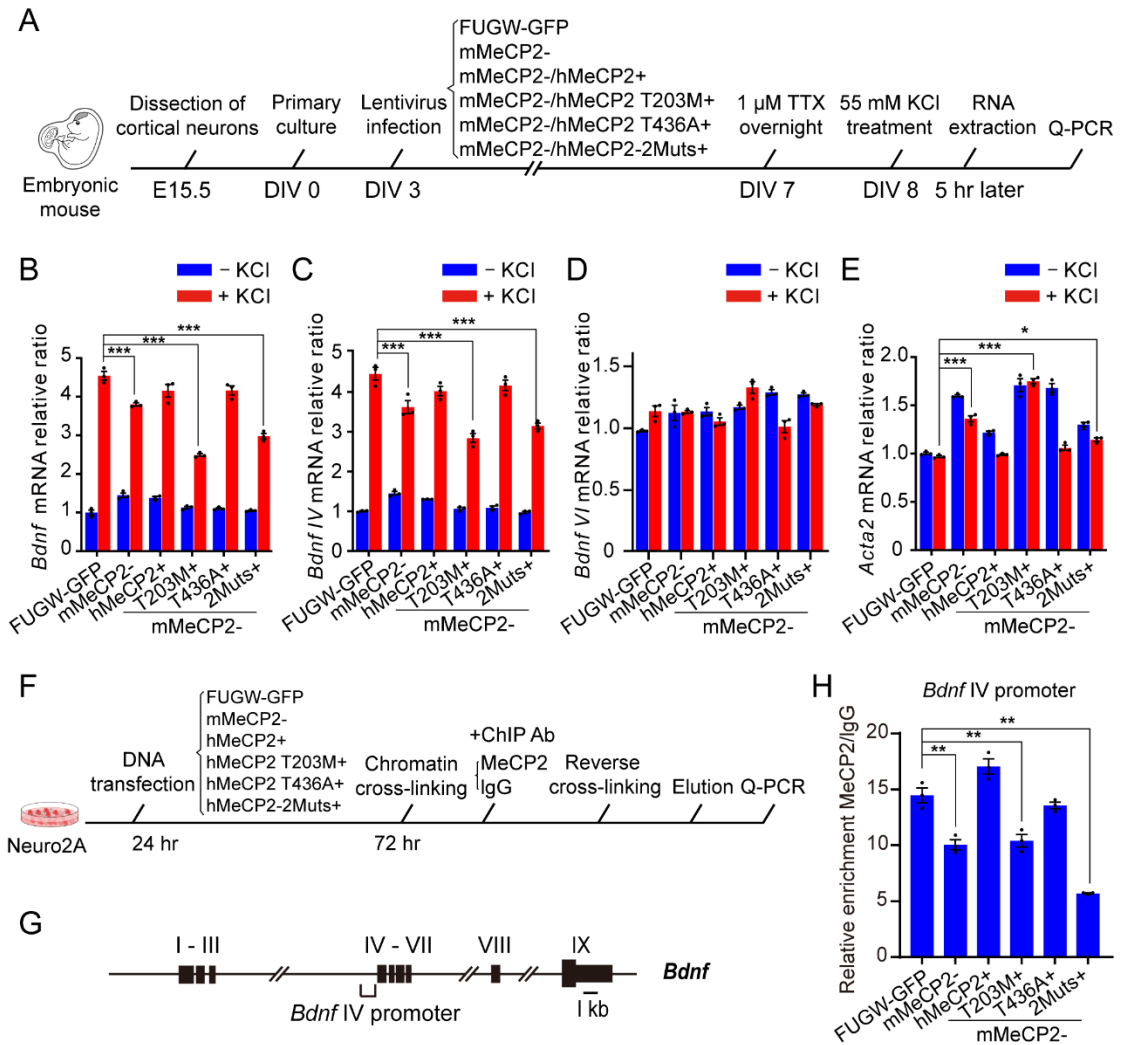

**Figure 7. T203 O-GlcNAcylation Activates *Bdnf* Promoter IV-Dependent Transcription**
